# Supplementary material for: Tissue factor as a potential coagulative/vascular marker in relapsing-remitting multiple sclerosis
Source: PubMed Central journal article supplement (PMC10424925; doi:10.3389/fimmu.2023.1226616), 2023-07-31
Supplement: DataSheet_1.pdf [file DataSheet_1.pdf]

## *Supplementary material*

### **Tissue factor as a potential coagulative/vascular marker**

#### **in relapsing-remitting multiple sclerosis**

Tatiana Koudriavtseva, MD, PhD;<sup>1,2</sup> Svetlana Lorenzano, MD, PhD, MSc;<sup>3</sup> Maria Cellerino, MD, PhD;<sup>2,4</sup> Mauro Truglio, MSc;<sup>5</sup> Marco Fiorelli, MD, PhD;<sup>3</sup> Caterina Lapucci, MD, PhD<sup>4</sup>; Giovanna D'Agosto, MSc;<sup>6</sup> Laura Conti, MD;<sup>5</sup> Annunziata Stefanile, MSc;<sup>5</sup> Silvana Zannino, MD;<sup>2</sup> Maria Maddalena Filippi, MD;<sup>7</sup> Antonio Cortese, MD, PhD;<sup>3</sup> Carlo Piantadosi MD;<sup>8</sup> Marta Maschio, MD;<sup>2</sup> Andrea Maialetti, MSc;<sup>2</sup> Edvina Galiè, MD, PhD;<sup>2</sup> Marco Salvetti, MD, PhD;<sup>9,10</sup> and Matilde Inglese, MD. PhD.<sup>11,4</sup>

1 Medical Direction, IRCCS (Istituto di Ricovero e Cura a Carattere Scientifico) Regina Elena National Cancer Institute, Rome, Italy, [tatiana.koudriavtseva@ifo.it](mailto:tatiana.koudriavtseva@ifo.it);

2 Department of Clinical Experimental Oncology, IRCCS (Istituto di Ricovero e Cura a Carattere Scientifico) Regina Elena National Cancer Institute, IFO (Istituti Fisioterapici Ospitalieri), Rome, Italy, [mariacellerino@hotmail.com](mailto:mariacellerino@hotmail.com), [marta.maschio@ifo.it](mailto:marta.maschio@ifo.it), [andrea.maialetti@ifo.it](mailto:andrea.maialetti@ifo.it), [edvina.galie@ifo.it](mailto:edvina.galie@ifo.it)

3 Department of Human Neurosciences, Sapienza University of Rome, Italy, [svetlana.lorenzano@gmail.com](mailto:svetlana.lorenzano@gmail.com), [marco.fiorelli@uniroma1.it](mailto:marco.fiorelli@uniroma1.it)

4 Department of Neuroscience, Rehabilitation, Ophthalmology, Genetics, Maternal and Child Health (DINOEMI, Dipartimento di Neuroscienze, Riabilitazione, Oftalmologia, Genetica e Scienze Materno-Infantili), University of Genoa, Genoa, Italy, [lapuccicate@gmail.com](mailto:lapuccicate@gmail.com), [m.inglese@unige.it](mailto:m.inglese@unige.it)

5 Clinical Pathology and Cancer Biobank, IRCCS (Istituto di Ricovero e Cura a Carattere Scientifico) Regina Elena National Cancer Institute, Rome, Italy, [mauro.truglio@ifo.it](mailto:mauro.truglio@ifo.it), [laura.conti@ifo.it](mailto:laura.conti@ifo.it), [stefanile.nunzia@gmail.com](mailto:stefanile.nunzia@gmail.com)

6 Clinical Pathology and Microbiology, IRCCS (Istituto di Ricovero e Cura a Carattere Scientifico) San Gallicano Dermatological Institute, Rome, Italy, [giovanna.dagosto@ifo.it](mailto:giovanna.dagosto@ifo.it)

7 Neuroscience and Imaging, Fatebenefratelli Hospital, Isola Tiberina, Rome, Italy, [filippi.mariam@gmail.com](mailto:filippi.mariam@gmail.com)

8 Unità Operativa Complessa (UOC) Neurology, San Giovanni-Addolorata Hospital, Rome, Italy, [cfpantadosi@gmail.com](mailto:cfpantadosi@gmail.com).

9 Department Of Neuroscience Mental Health and Sensory Organs (NEMOS), Sapienza University, Rome, Italy, [marco.salvetti@uniroma1.it](mailto:marco.salvetti@uniroma1.it)

10 IRCCS Istituto Neurologico Mediterraneo Neuromed, Pozzilli, Italy

11 Department of Neurology, Mount Sinai Hospital, New York, USA, [matilde.inglese@mssm.edu](mailto:matilde.inglese@mssm.edu)

Correspondence to: Svetlana Lorenzano, MD, PhD, MSc, FESO

Department of Human Neurosciences

Sapienza University of Rome,

Viale dell'Università 30, 00185

Rome, Italy

Telephone: 0039 349 2180282

Email: [svetlana.lorenzano@gmail.com](mailto:svetlana.lorenzano@gmail.com)

## Supplementary Tables: 6

### Supplementary Methods

#### *Laboratory data*

A list of the laboratory biomarkers is reported in Supplementary Table 1.

Evaluation of **complement and coagulation markers** included serum/plasma concertation of D-Dimer, Fibrinogen, Factor II (FII), Factor VII (FVII), Factor VIII (FVIII), Factor X (FX), Prothrombin Time (PT), Activated Partial Thromboplastin Time (APTT), Antithrombin III (ATIII), Protein C (PC), Protein S (PS), von Willebrand Factor (VWF), C3, C4, Human Activated C4 (aC4), Activated Human C9 (aC9), Angiopoietin I, Angiopoietin II, Human Coagulation Factor III/Tissue Factor (TF), Vascular Endothelial Growth Factor (VEGF), Soluble Endothelial protein C receptor (sEPCR), Human Tie-2, P-Selectin/CD62P, E-selectin/CD62E, Endothelin-1, PLA2G7/PAF, Thrombomodulin/BDCA-3, fragment 1+2 of prothrombin (PF1/2) and of the thrombin-antithrombin III complex (TAT), Vitamin A, K, E and D and antiphospholipid antibodies (APLs)LP, including Anti-Cardiolipin (IgG, IgM), Anti-b2 Glycoprotein I (IgG, IgM), Anti-Prothrombin (IgG, IgM), and Anti-AnnexinV (IgG/IgM).

As per **viral/microbiological serological assay**, we evaluated the concentration of Epstein-Barr (EBV) IgA/IgG/IgM, EBV-EBNA-1 IgG/IgM, EBV-VCA IgG/IgM, Chlamydia IgA/IgG/IgM, InfluenzaA IgA/IgG/IgM, InfluenzaB IgA/IgG/IgM, Herpes Simplex (HSV) Type1-2 IgG/IgM, HerpesSimplexType1 HSVType1 IgG/IgM, HerpesSimplexType2 HSVType2 IgG/IgM, Cytomegalovirus (CMV) IgG/IgM, Mycoplasma IgA/IgG/IgM, Varicella HerpesZoster (EZV) IgA/IgG/IgM, Ascaris IgG, Fascicola IgG, Schistosoma IgG.

For the **blood cell count** test, we analyzed the number of red blood cells (erythrocytes or RBC), white blood cells (leukocytes or WBC) including neutrophils (Neu) and lymphocytes (Lym), platelets (PLT), and the calculation of the neutrophil to lymphocyte ratio (NLR) and neutrophil to platelets ratio (PLR), hematocrit (HCT), hemoglobin (Hb), levels of the leukocyte formula (percentage of different white blood cells including neutrophils and lymphocytes), as well as the physical characteristics of the red blood cells by means of the following indices: MCV (mean corpuscular volume (MCV), MCH (mean corpuscular hemoglobin), MCHC (Mean Corpuscular Hemoglobin Concentration).

In the patient group alone, lymphocyte sub-populations count was measured including CD3+, CD8+, and CD4+ T-cells and the ratio between CD4 and CD8, CD19+ B-cells, and CD16/CD56 NK cells.

**Supplementary Table 1. List of the laboratory biomarkers measured in the study**

| Abbreviation                              | Extended name                          | Unit    |
|-------------------------------------------|----------------------------------------|---------|
| <i>Coagulation and complement markers</i> |                                        |         |
| Fibrinogen                                | Fibrinogen                             | mg/dl   |
| PT%                                       | Prothrombin Time %                     | %       |
| PT                                        | Prothrombin Time                       | seconds |
| APTT                                      | Activated Prothrombin Time             | seconds |
| APTT-ratio                                | Activated Prothrombin Time - ratio     |         |
| PS                                        | Protein S                              | %       |
| PC                                        | Protein C                              | %       |
| FII                                       | Factor II                              | %       |
| FVII                                      | Factor VII                             | %       |
| FVIII                                     | Factor VIII                            | %       |
| FX                                        | Factor X                               | %       |
| vWF                                       | von Willebrand Factor                  | %       |
| AT III                                    | Antithrombin                           | %       |
| TAT                                       | Thrombin – Antithrombin Complex        | µg/l    |
| DD                                        | D-dimer                                | ng/ml   |
| C3                                        | Complement component 3                 | mg/dl   |
| C4                                        | Complement component 4                 | mg/dl   |
| aC4                                       | Activated C4                           | ng/ml   |
| aC9                                       | Activated C9                           | µg/ml   |
| AngI                                      | Angiopoietin I                         | pg/ml   |
| AngII                                     | Angiopoietin II                        | pg/ml   |
| TF                                        | Coagulation Factor III/Tissue Factor   | pg/ml   |
| VEGF                                      | Vascular Endothelial Growth Factor     | UM      |
| Tie-2                                     | Tie-2                                  | UM      |
| sEPCR                                     | Soluble Endothelial protein C receptor | pg/ml   |
| P-Sel                                     | P-Selectin/CD62P                       | UM      |
| E-Sel                                     | E-selectin/CD62E                       | UM      |
| End-1                                     | Endothelin-1                           | UM      |
| PLA2G7/PAF                                | PLA2G7/PAF                             | UM      |
| Thr                                       | Thrombomodulin/BDCA-3                  | UM      |
| PF1/2                                     | Prothrombin Fragment 1/2               | pmol/L  |
| VitA                                      | Vitamin A                              | UM      |
| VitK                                      | Vitamin K                              | UM      |
| VitE                                      | Vitamin E                              | UM      |
| VitD                                      | Vitamin D                              | UM      |
| ENA                                       | Extractable Nuclear Antigen index      |         |
| Anti-card IgG                             | Anti-cardiolipin IgG                   | MPL     |
| Anti-card IgM                             | Anti-cardiolipin IgM                   | MPL     |
| Anti-β2 GPI IgG                           | Anti-Beta2 Glicoprotein I IgG          | U/ml    |
| Anti-β2 GPI IgM                           | Anti-Beta2Glicoprotein I IgM           | U/ml    |
| Anti-ptb IgG                              | Anti-prothrombin IgG                   | U/ml    |
| Anti-ptb IgM                              | Anti-prothrombin IgM                   | U/ml    |
| Anti-ann IgG                              | Anti-annexin IgG                       | U/ml    |
| Anti-ann IgM                              | Anti-annexin IgM                       | U/ml    |

| <b><i>Viral/microbiological serological assays</i></b> |                                                           |                       |
|--------------------------------------------------------|-----------------------------------------------------------|-----------------------|
| EB IgA                                                 | Epstein-Barr IgA                                          | U/ml                  |
| EB IgG                                                 | Epstein-Barr IgG                                          | U/ml                  |
| EB IgM                                                 | Epstein-Barr IgM                                          | U/ml                  |
| EBV-EBNA IgG                                           | Epstein Barr Virus-Epstein Barr Nuclear Antigen-1 IgG     | U/ml                  |
| EBV-EBNA IgM                                           | Epstein Barr Virus-Epstein Barr Nuclear Antigen -1 IgM    | U/ml                  |
| EBV-VCA IgG                                            | Epstein Barr Virus-Viral Capsid Antigen IgG               | U/ml                  |
| EBV-VCA IgM                                            | Epstein Barr Virus-Viral Capsid Antigen IgM               | U/ml                  |
| Chl IgA                                                | Chlamydia IgA                                             | DU                    |
| Chl IgG                                                | Chlamydia IgG                                             | DU                    |
| Chl IgM                                                | Chlamydia IgM                                             | DU                    |
| InfA IgA                                               | InfluenzaA IgA                                            | DU                    |
| InfA IgG                                               | InfluenzaA IgG                                            | DU                    |
| InfA IgM                                               | InfluenzaA IgM                                            | DU                    |
| InfB IgA                                               | InfluenzaB IgA                                            | DU                    |
| InfB IgG                                               | InfluenzaB IgG                                            | DU                    |
| InfB IgM                                               | InfluenzaB IgM                                            | DU                    |
| HS 1-2 IgG                                             | HerpesSimplexType1-2 IgG                                  | DU                    |
| HS 1-2 IgM                                             | HerpesSimplexType1-2 IgM                                  | DU                    |
| HS 1 IgG                                               | HerpesSimplexType1 IgG                                    | DU                    |
| HS 1 IgM                                               | HerpesSimplexType1 IgM                                    | DU                    |
| HS 2 IgG                                               | HerpesSimplexType2 IgG                                    | DU                    |
| HS 2 IgM                                               | HerpesSimplexType2 IgM                                    | DU                    |
| Cyt IgG                                                | Cytomegalovirus IgG                                       | DU                    |
| Cyt IgM                                                | Cytomegalovirus IgM                                       | DU                    |
| Myc IgA                                                | Mycoplasma IgA                                            | DU                    |
| Myc IgG                                                | Mycoplasma IgG                                            | DU                    |
| Myc IgM                                                | Mycoplasma IgM                                            | DU                    |
| Var IgA                                                | Varicella IgA                                             | DU                    |
| Var IgG                                                | Varicella IgG                                             | DU                    |
| Var IgM                                                | Varicella IgM                                             | DU                    |
| Asc IgG                                                | Ascaris IgG                                               | DU                    |
| Fas IgG                                                | Fascicola IgG                                             | DU                    |
| Sch IgG                                                | Schistosoma IgG                                           | DU                    |
| <b><i>Blood cell count</i></b>                         |                                                           |                       |
| WBC                                                    | White blood cells                                         | ccx10 <sup>9</sup> /L |
| RBC                                                    | Red blood cells                                           | ccx10 <sup>9</sup> /L |
| PLT                                                    | Platelets                                                 | ccx10 <sup>9</sup> /L |
| Hb                                                     | Hemoglobin                                                | g/L                   |
| Htc                                                    | Hematocrit                                                | %                     |
| MCV                                                    | Mean Corpuscular Volume                                   | fL                    |
| MCH                                                    | Mean Corpuscular Hemoglobin                               | pg                    |
| MCHC                                                   | Mean Corpuscular Hemoglobin Concentration                 | g/L                   |
| RDW                                                    | Red blood cells Distribution Width                        | %                     |
| MPV                                                    | Mean Platelet Volume                                      | fL                    |
| PDW                                                    | Platelet Distribution Width                               |                       |
| Neu                                                    | Neutrophil                                                | ccx10 <sup>9</sup> /L |
| Lym                                                    | Lymphocyte                                                | ccx10 <sup>9</sup> /L |
| NLR                                                    | Neutrophil to lymphocyte ratio                            |                       |
| PLR                                                    | Platelets to lymphocyte ratio                             |                       |
| CD3+T                                                  | Cluster of Differentiation 3+ T cells                     | cells/ml              |
| CD4+T                                                  | Cluster of Differentiation 4+ T cells                     | cells/ml              |
| CD8+T                                                  | Cluster of Differentiation 8+ T cells                     | cells/ml              |
| CD4/CD8                                                | Cluster of Differentiation 4/Cluster of Differentiation 8 | cells/ml              |
| CD19+B                                                 | Cluster of Differentiation 19+ B cells                    | cells/ml              |

|           |                                                                            |          |
|-----------|----------------------------------------------------------------------------|----------|
| CD16/CD56 | Cluster of Differentiation 16/Cluster of Differentiation 56 Natural Killer | cells/ml |
|-----------|----------------------------------------------------------------------------|----------|

### ***Neuroimaging data***

A list of the neuroimaging metrics is reported in Supplementary Table 2.

All MS patients underwent 3.0-T MRI within two weeks of enrollment.

### **Lesion analysis**

White matter lesions (WML) were manually segmented by using Jim software (Xinapse, Version 7.0) on 3D FLAIR, 3D T1 MPRAGE, T1SE 3 mm-resliced images. Brain volumes segmentation was performed on 3D T1 MPRAGE images after nu-correction and lesion filling by using Matlab-based Statistical Parametric Mapping Toolbox (SPM CAT12; <http://www.fil.ion.ucl.ac.uk/spm>).

### **Perfusion analysis**

We used dynamic-susceptibility contrast-enhanced (DSC) perfusion technique acquired during the first pass of gadolinium to estimate perfusion features inside the damaged tissue of relapsing- and remitting-MS patients. DSC MR images were acquired on the axial plane during the first pass of a standard-dose bolus (0.1 mmol/kg) of gadoterate meglumine (Dotarem; Guerbet Laboratories, Villepinte, France) with a gradient-echo T2-weighted echoplanar imaging sequence. The contrast agent was injected at a rate of 3,5 mL/sec, followed by a 20-mL bolus of saline also at a rate of 3,5 mL/sec. A total of 60 images were acquired at 1-sec intervals, with the injection occurring at the fifth image, for a total acquisition time of 2 min 16 s. The imaging parameters were as follows: TR/TE = 2140/30 ms, flip angle = 30°, slice thickness = 4 mm, FOV = 280 mm, matrix = 128x128. Perfusion maps (CBF, CBV, MTT) were created by using nordICE software package. Deep gray matter (DGM) structures segmentation was obtained by using FIRST software. After co-registration of structural images with perfusion maps, CBV, CBF and MTT metrics were extracted from enhancing and non-enhancing WML, DMG and NAWM.

A leakage correction analysis was also performed, in order to correct for contrast agent extravasation. Due to partial volume effects in the measured Arterial Input Function (AIF) combined with non-linear dose-response conditions in DSC PWI, the obtained CBF and CBV values do not generally reflect absolute perfusion and blood volume values, and were consequently reported in arbitrary units.

### **Supplementary Table 2. List of the radiological (MRI) metrics measured in the study**

| Metric                 | Explored areas | Unit |
|------------------------|----------------|------|
| <i>Lesion analysis</i> |                |      |

|                                  |                                                                                                                                                                                                                                |                   |
|----------------------------------|--------------------------------------------------------------------------------------------------------------------------------------------------------------------------------------------------------------------------------|-------------------|
| <b>Lesion volumes</b>            | FLAIR lesions                                                                                                                                                                                                                  | ml                |
| <b>Number of lesions</b>         | T1 lesions<br>Active (Gd+) lesions                                                                                                                                                                                             | -                 |
| <b>Perfusion metric analysis</b> |                                                                                                                                                                                                                                |                   |
| <b>MTT</b>                       | FLAIR lesions<br>Active (Gd+) lesions<br>NAWM<br>Caudate ( <i>right, left, global</i> )<br>Thalamus ( <i>right, left, global</i> )<br>Globus pallidus ( <i>right, left, global</i> )<br>Putamen ( <i>right, left, global</i> ) | n.a. <sup>#</sup> |
| <b>MTT leakage<sup>o</sup></b>   |                                                                                                                                                                                                                                |                   |
| <b>CBV putamen</b>               |                                                                                                                                                                                                                                |                   |
| <b>CBV leakage<sup>o</sup></b>   |                                                                                                                                                                                                                                |                   |
| <b>CBF</b>                       |                                                                                                                                                                                                                                |                   |
| <b>CBF leakage<sup>o</sup></b>   |                                                                                                                                                                                                                                |                   |

CBF=cerebral blood flow; CBV= cerebral blood volume; FLAIR=fluid-attenuated inversion recovery; Gd+=gadolinium enhancing; MTT=mean transit time; NAWM=normal appearing white matter; n.a. not available

<sup>o</sup> A leakage correction analysis was also performed, in order to correct for contrast agent extravasation.

<sup>#</sup> Due to partial volume effects in the measured Arterial Input Function (AIF) combined with non-linear dose-response conditions in DSC PWI, the obtained CBF and CBV values do not generally reflect absolute perfusion and blood volume values, and were consequently reported in arbitrary units.

## Supplementary Results

All between-groups (both statistically significant and non-significant) differences in serum/plasma laboratory variables are reported in Supplementary Table 3.

### Supplementary Table 3. Between group differences in terms of laboratory biomarkers in controls and remitting- and relapsing-multiple sclerosis patients

| A -<br>Coagulation/complement/bio<br>markers | Controls (n=30)  |               | Remitting-MS (n=30) |                 | Relapsing-MS (n=30) |                | P-<br>value*             |
|----------------------------------------------|------------------|---------------|---------------------|-----------------|---------------------|----------------|--------------------------|
|                                              | Mean (SD)        | Median (IQR)  | Mean (SD)           | Median (IQR)    | Mean (SD)           | Median (IQR)   |                          |
| PT                                           | 1.032 (0.095)    | 1.01 (0.105)  | 1.031 (0.086)       | 1.03 (0.078)    | 1.034 (0.067)       | 1.025 (0.1)    | 0.98                     |
| PT%                                          | 96.867 (12.292)  | 99 (15.5)     | 97 (11.671)         | 96 (12)         | 95.867 (9.104)      | 96.5 (13.75)   | 0.91                     |
| APTT                                         | 31.017 (2.451)   | 30.5 (3.45)   | 30.023 (2.873)      | 30.25 (2.95)    | 31.023 (2.499)      | 30.85 (3.625)  | 0.936                    |
| APTT-ratio                                   | 0.979 (0.075)    | 0.965 (0.095) | 0.955 (0.077)       | 0.95 (0.1)      | 0.972 (0.083)       | 0.975 (0.115)  | 0.486                    |
| PS                                           | 91.567 (14.5)    | 88.5 (24.25)  | 80.367 (22.338)     | 81 (30)         | 87.267 (16.432)     | 91.5 (17.25)   | 0.058                    |
| PC                                           | 99.13 (14.44)    | 97.5 (25.25)  | 110.66 (18.07)      | 116.5 (28.5)    | 116.86 (20.74)      | 117 (30)       | <b>0.001<sup>a</sup></b> |
| FII                                          | 102.111 (10.5)   | 102 (9.5)     | 104.833 (12.647)    | 105 (13.5)      | 98.767 (13.505)     | 97 (14.25)     | 0.169                    |
| FVII                                         | 82.264 (26.221)  | 85.55 (33)    | 90.041 (25.071)     | 88.8 (28.95)    | 89.679 (22.27)      | 89.9 (24.9)    | 0.469                    |
| FVIII                                        | 118.103 (23.966) | 116 (33)      | 125.433 (28.441)    | 129 (30)        | 122.933 (32.601)    | 119 (33)       | 0.609                    |
| FX                                           | 88.397 (12.614)  | 87.4 (15.175) | 95.307 (15.972)     | 93.55 (21.525)  | 94.417 (13.963)     | 93.55 (14.225) | 0.13                     |
| VWF                                          | 123.28 (48.699)  | 108.2 (53.85) | 140.303 (55.532)    | 137.85 (53.525) | 121.914 (43.678)    | 118.7 (36.675) | 0.251                    |
| AT                                           | 105.6 (7.295)    | 106 (9.25)    | 107.2 (9.045)       | 107 (10.25)     | 106.967 (11.149)    | 107.5 (12.75)  | 0.772                    |
| TAT                                          | 1.77 (1.856)     | 1.25 (1.275)  | 2.735 (4.554)       | 1.5 (1.55)      | 1.934 (1.277)       | 1.6 (1.7)      | 0.503                    |

|                   |                  |                 |                      |                   |                   |                   |                              |
|-------------------|------------------|-----------------|----------------------|-------------------|-------------------|-------------------|------------------------------|
| DD                | 205.9 (89.215)   | 192.5 (73.75)   | 293.367<br>(198.629) | 250 (133.5)       | 286.9 (150.555)   | 233.5 (193.75)    | 0.073                        |
| C3                | 109.067 (15.37)  | 109 (18)        | 119.47 (24.6)        | 115.5 (32)        | 114.33 (18.9)     | 114 (24.25)       | 0.286                        |
| C4                | 25.23 (18.1)     | 22.5 (7.75)     | 23.6 (6.62)          | 23 (6)            | 23.07 (5.15)      | 24 (5.75)         | 0.703                        |
| aC4               | 5.78 (5.21)      | 4.75 (1.725)    | 2.75 (1.43)          | 2.3 (1.125)       | 3.91 (3.13)       | 2.85 (2.107)      | <b>0.001<sup>b</sup></b>     |
| aC9               | 3.38 (1.13)      | 3.4 (1.675)     | 4.91 (3.03)          | 4.3 (3.3)         | 5.42 (4.13)       | 4.4 (3.54)        | <b>0.019<sup>c</sup></b>     |
| AngI              | 9.40 (4.04)      | 8.38 (4.34)     | 7.31 (2.96)          | 7.26 (2.84)       | 10.57 (4.83)      | 9.76 (5.75)       | <b>0.009<sup>d</sup></b>     |
| AngII             | 2943.04 (981.37) | 2600 (1095)     | 2631.82 (1007)       | 2360 (1202.5)     | 3258.27 (1358.26) | 2953.5 (1385.5)   | 0.11                         |
| TF                | 110.85 (56.31)   | 120.69 (101.11) | 94.06 (55.83)        | 99.23 (104.22)    | 45.03 (37.66)     | 22.72 (58.67)     | <b>&lt;0.001<sup>e</sup></b> |
| VEGF              | 32.07 (23.83)    | 24.5 (24)       | 26.03 (12.89)        | 23 (15.75)        | 41.82 (31.98)     | 33 (39)           | 0.224                        |
| Tie-2             | 49.60 (17.58)    | 43.15 (10.775)  | 46.45 (17.36)        | 40.85 (22.425)    | 34.42 (19.94)     | 35.7 (25.3)       | <b>0.002<sup>f</sup></b>     |
| sEPCR             | 21.97 (21.82)    | 13.1 (29.5)     | 25.85 (24.85)        | 17 (22.95)        | 22.22 (19.44)     | 15.35 (24.7)      | 0.860                        |
| P-Sel             | 245.85 (120.48)  | 197 (156)       | 216.26 (82.15)       | 216.5 (131)       | 169.41 (173.51)   | 160 (215.4)       | <b>0.020<sup>g</sup></b>     |
| E-Sel             | 170.99 (57.49)   | 153.995 (90)    | 159.02 (84.42)       | 149.6 (156.145)   | 127.21 (100.84)   | 127.05 (175.475)  | 0.122                        |
| End-1             | 24.00 (8.44)     | 23 (8)          | 24.17 (8.20)         | 26 (12)           | 23.68 (19.99)     | 24 (28.825)       | 0.965                        |
| PLA2G7/PAF        | 138.71 (39.93)   | 139.7 (62.7)    | 144.51 (50.41)       | 149.1 (62.5)      | 146.88 (48.38)    | 150.75 (63.15)    | 0.787                        |
| Thr               | 2060.24 (862.96) | 1829 (810)      | 2377.11 (628.72)     | 2352.5 (1020.2)   | 2678.30 (1610.63) | 2089.5 (1206)     | 0.198                        |
| PF 1/2            | 158.433 (60.584) | 158.5 (84.5)    | 190.433 (81.946)     | 173.5 (122.5)     | 170.067 (69.169)  | 170.5 (94.25)     | 0.217                        |
| VitA <sup>o</sup> | 40.75 (18.15)    | 32.68 (21.925)  | 43.15 (12.77)        | 41.63 (12.43)     | 105.18 (50.07)    | 100.8 (101.13)    | <b>&lt;0.001<sup>h</sup></b> |
| VitK <sup>o</sup> | 163.89 (110.80)  | 126.49 (119.56) | 166.75 (107.20)      | 148.405 (167.115) | 295.51 (64.84)    | 272.455 (299.222) | <b>&lt;0.001<sup>i</sup></b> |
| VitE <sup>o</sup> | 812.85 (124.21)  | 788.02 (105.73) | 787.11 (120.43)      | 791.975 (145.188) | 849.13 (188.01)   | 742.3 (840.653)   | 0.590                        |
| VitD <sup>o</sup> | 19.43 (7.95)     | 21 (12.2)       | 24.60 (8.66)         | 24.25 (10.05)     | 22.45 (6.12)      | 22.3 (7.8)        | 0.470                        |
| ENA               | -                | -               | 0.23 (0.164)         | 0.2 (0)           | 0.325 (0.514)     | 0.2 (0)           | 0.5                          |
| Anti-card. IgG    | 2.17 (1.71)      | 1.6 (0)         | 2.43 (1.72)          | 1.6 (0.75)        | 2.37 (2.58)       | 1.6 (0.025)       | 0.146                        |
| Anti-card. IgM    | 2.26 (3.44)      | 0.75 (2.275)    | 3.41 (6.41)          | 0.65 (2.15)       | 2.91 (5.80)       | 0.6 (2.5)         | 0.790                        |
| Anti-β2 IgG       | 1.66 (0.83)      | 1.4 (0)         | 1.67 (0.79)          | 1.4 (0.15)        | 1.73 (1.10)       | 1.4 (0)           | 0.558                        |
| Anti-β2 IgM       | 2.21 (3.04)      | 0.9 (1.95)      | 2.82 (5.11)          | 0.9 (1.6)         | 2.28 (3.59)       | 0.65 (1.8)        | 0.812                        |
| Anti-ptb. IgG     | 5.89 (4.61)      | 4.4 (3.9)       | 5.14 (2.23)          | 4.8 (2.375)       | 4.68 (2.89)       | 4.05 (1.925)      | 0.336                        |
| Anti-ptb IgM      | 4.87 (6.63)      | 2.4 (1.875)     | 3.15 (2.96)          | 2 (2.05)          | 5.86 (12.52)      | 2.2 (1.875)       | 0.642                        |
| Anti-ann IgG      | 2.61 (1.78)      | 0.9 (0.875)     | 3.64 (4.97)          | 1.1 (0.6)         | 3.02 (2.93)       | 0.9 (0.55)        | 0.925                        |
| Anti-ann IgM      | 2.45 (6.83)      | 1.95 (1.725)    | 1.14 (0.68)          | 1.95 (1.275)      | 1.28 (1.39)       | 2.1 (1.575)       | 0.815                        |

| B – Serological viral /<br>microbiological assay | Controls (n=30) |               | Remitting-MS (n=30) |              | Relapsing-MS (n=30) |               | P-<br>value*             |
|--------------------------------------------------|-----------------|---------------|---------------------|--------------|---------------------|---------------|--------------------------|
|                                                  | Mean (SD)       | Median (IQR)  | Mean (SD)           | Median (IQR) | Mean (SD)           | Median (IQR)  |                          |
| EB IgA                                           | 1.47 (1.19)     | 1.24 (0.438)  | 1.61 (1.23)         | 1.24 (0.93)  | 1.55 (0.99)         | 1.195 (1.083) | 0.800                    |
| EB IgG                                           | 12.65 (38.39)   | 1.65 (1.85)   | 10.63 (28.098)      | 2.3 (3.025)  | 2.86 (3.13)         | 1.7 (0.75)    | 0.117                    |
| EB IgM                                           | 6.62 (7.39)     | 4.35 (3.5)    | 3.87 (1.86)         | 3.45 (2.6)   | 4.30 (2.55)         | 3.75 (2.75)   | 0.191                    |
| EBV-EBNA IgG                                     | 26.81 (7.48)    | 27.65 (8.325) | 31.05 (6.35)        | 32.15 (6.3)  | 31.89 (4.66)        | 32 (5.3)      | <b>0.014<sup>l</sup></b> |
| EBV-EBNA IgM                                     | 4.79 (4.37)     | 3.35 (2.55)   | 5.95 (4.79)         | 4.9 (6.075)  | 5.35 (4.37)         | 4.65 (6.575)  | 0.622                    |

|             |               |                |               |               |               |                |                          |
|-------------|---------------|----------------|---------------|---------------|---------------|----------------|--------------------------|
| EBV-VCA IgG | 47.14 (20.32) | 50.2 (27.175)  | 56.01 (16.07) | 57.9 (18.05)  | 57.17 (19.49) | 66.3 (25.1)    | 0.070                    |
| EBV-VCA IgM | 7.47 (6.91)   | 4.7 (4.375)    | 5.88 (2.51)   | 4.85 (3.85)   | 7.24 (11.86)  | 5.65 (3.275)   | 0.635                    |
| Chl IgA     | 2.60 (1.99)   | 1.85 (1.775)   | 4.14 (5.07)   | 2.25 (2.25)   | 2.50 (1.58)   | 2.2 (1.575)    | 0.570                    |
| Chl IgG     | 6.65 (6.01)   | 4.5 (10.875)   | 7.21 (7.54)   | 6 (8.925)     | 7.01 (5.57)   | 5.75 (10.025)  | 0.870                    |
| Chl IgM     | 4.28 (3.47)   | 3.15 (2.375)   | 3.62 (2.27)   | 2.9 (2.525)   | 3.07 (1.37)   | 2.6 (2.1)      | 0.580                    |
| InfA IgA    | 2.49 (3.23)   | 1.45 (0.825)   | 2.91 (2.72)   | 2.1 (1.725)   | 1.71 (1.23)   | 1.35 (0.75)    | <b>0.029<sup>n</sup></b> |
| InfA IgG    | 11.59 (7.61)  | 8.75 (9.275)   | 15.87 (7.49)  | 15.7 (12.375) | 17.88 (11.98) | 12.45 (21.45)  | <b>0.041<sub>m</sub></b> |
| InfA IgM    | 3.24 (4.64)   | 1.9 (1.425)    | 2.22 (2.99)   | 1.55 (1.55)   | 1.89 (2.67)   | 1.4 (1.375)    | 0.350                    |
| InfB IgA    | 1.81 (1.64)   | 1.15 (1.95)    | 1.90 (1.76)   | 1.9 (1.1)     | 1.68 (1.42)   | 1.2 (1.55)     | 0.282                    |
| InfB IgG    | 15.12 (7.55)  | 14.75 (5.05)   | 19.30 (9.68)  | 17.3 (12.075) | 14.08 (8.99)  | 13.1 (9.75)    | 0.059                    |
| InfB IgM    | 1.99 (3.66)   | 0.8 (0.9)      | 1.18 (1.93)   | 0.7 (0.675)   | 1.18 (2.28)   | 0.65 (0.75)    | 0.601                    |
| HS 1-2 IgG  | 12.93 (12.23) | 11.25 (20.25)  | 16.79 (12.78) | 17 (22.25)    | 17.53 (12.79) | 17.4 (23.7)    | 0.320                    |
| HS 1-2 IgM  | 5.85 (5.65)   | 4.1 (5.575)    | 3.78 (2.74)   | 2.95 (3.475)  | 4.61 (4.25)   | 2.85 (4.975)   | 0.480                    |
| HS 1 IgG    | 21.43 (18.84) | 18.7 (34.875)  | 24.49 (19.83) | 20.9 (41.125) | 26.11 (19.18) | 27.85 (39.775) | 0.545                    |
| HS 1 IgM    | 4.65 (3.99)   | 2.95 (2.525)   | 3.84 (2.96)   | 2.8 (3.1)     | 4.01 (4.22)   | 2.3 (2.925)    | 0.201                    |
| HS 2 IgG    | 7.03 (10.36)  | 2.15 (4.1)     | 7.45 (11.38)  | 3.2 (3.85)    | 8.03 (9.42)   | 4.45 (7.4)     | 0.135                    |
| HS 2 IgM    | 4.90 (6.26)   | 2.8 (4.675)    | 2.96 (2.52)   | 1.95 (2.8)    | 3.97 (3.81)   | 2.75 (4.15)    | 0.651                    |
| Cyt IgG     | 32.81 (37.74) | 21.65 (63.7)   | 37.51 (34.08) | 45.4 (62.325) | 29.06 (34.27) | 9.35 (58.4)    | 0.419                    |
| Cyt IgM     | 23.34 (46.49) | 5.6 (14.7)     | 12.84 (22.58) | 4 (7.4)       | 18.62 (62.78) | 2.9 (5.15)     | 0.431                    |
| Myc IgA     | 7.21 (5.12)   | 6.15 (3.65)    | 7.03 (2.65)   | 6.7 (4.025)   | 5.46 (2.49)   | 4.9 (1.675)    | 0.060                    |
| Myc IgG     | 13.38 (10.04) | 10.95 (10.875) | 13.36 (10.47) | 12 (7.375)    | 14.07 (16.14) | 10.3 (10.05)   | 0.862                    |
| Myc IgM     | 8.11 (7.02)   | 6.8 (4.6)      | 5.69 (2.57)   | 4.95 (3.925)  | 4.97 (1.88)   | 4.55 (2.125)   | 0.055                    |
| Var IgA     | 7.18 (6.37)   | 5.25 (4.575)   | 7.74 (7.72)   | 4.25 (6)      | 5.63 (4.35)   | 4.05 (6.4)     | 0.767                    |
| Var IgG     | 17.08 (4.36)  | 18.3 (4.525)   | 16.08 (6.19)  | 16.7 (6.3)    | 19.18 (2.85)  | 18.75 (2.625)  | 0.092                    |
| Var IgM     | 3.86 (3.79)   | 2.65 (2.65)    | 5.50 (7.60)   | 2.4 (3.125)   | 2.85 (1.60)   | 2.45 (1.475)   | 0.596                    |
| Asc IgG     | 7.02 (2.62)   | 7 (4.2)        | 7.22 (3.46)   | 6.1 (4.625)   | 5.76 (3.22)   | 5 (3.325)      | 0.055                    |
| Fas IgG     | 2.27 (1.63)   | 1.8 (0.525)    | 2.31 (0.99)   | 2.05 (1.075)  | 1.81 (0.79)   | 1.6 (1.05)     | 0.067                    |
| Sch IgG     | 4.79 (1.74)   | 4.6 (2.225)    | 4.75 (2.28)   | 4.15 (2.25)   | 3.86 (1.41)   | 3.4 (0.65)     | <b>0.023<sup>o</sup></b> |

| C - Complete blood cell count | Controls (n=30) |               | Remitting-MS (n=30) |               | Relapsing-MS (n=30) |               | P-value*                 |
|-------------------------------|-----------------|---------------|---------------------|---------------|---------------------|---------------|--------------------------|
|                               | Mean (SD)       | Median (IQR)  | Mean (SD)           | Median (IQR)  | Mean (SD)           | Median (IQR)  |                          |
| WBC                           | 5.91 (1.53)     | 5.87 (1.862)  | 6.29 (1.68)         | 6.165 (2.35)  | 6.41 (2.40)         | 5.8 (2.383)   | 0.560                    |
| RBC                           | 4.71 (0.38)     | 4.585 (0.567) | 4.59 (0.47)         | 4.59 (0.68)   | 4.59 (0.36)         | 4.565 (0.498) | 0.445                    |
| Plt                           | 251.80 (63.79)  | 251 (65.5)    | 251.46 (68.81)      | 251 (85.25)   | 255.16 (56.33)      | 242 (76)      | 0.969                    |
| Hb                            | 14.05 (1.13)    | 13.8 (1.625)  | 13.49 (1.21)        | 13.3 (1.45)   | 13.63 (1.23)        | 13.5 (1.85)   | 0.182                    |
| Htc                           | 42.42 (3.08)    | 41.55 (3.55)  | 40.95 (3.47)        | 40.35 (3.625) | 40.75 (3.34)        | 40.65 (4.4)   | 0.109                    |
| MCV                           | 90.39 (6.40)    | 91.9 (4.275)  | 89.55 (6.16)        | 89.65 (7.575) | 88.27 (4.98)        | 88.3 (7)      | 0.377                    |
| MCH                           | 29.94 (2.47)    | 30.5 (1.875)  | 29.51 (2.34)        | 29.5 (2.625)  | 29.73 (1.88)        | 29.75 (2.825) | 0.754                    |
| MCHC                          | 33.11 (0.79)    | 33.2 (0.875)  | 32.94 (0.66)        | 32.85 (0.775) | 33.45 (0.74)        | 33.2 (1.25)   | <b>0.027<sup>p</sup></b> |
| RDW                           | 13.493 (0.751)  | 13.4 (0.775)  | 13.667 (1.004)      | 13.45 (0.8)   | 13.5 (0.859)        | 13.3 (0.75)   | 0.68                     |



|           |                |                  |                |                 |                 |                   |                          |
|-----------|----------------|------------------|----------------|-----------------|-----------------|-------------------|--------------------------|
| MPV       | 9.247 (1.098)  | 9.15 (1.6)       | 9.127 (1.084)  | 9.05 (1.3)      | 9.247 (1.21)    | 9.15 (1.825)      | 0.89                     |
| PDW       | 16.93 (0.594)  | 16.9 (0.6)       | 16.94 (0.505)  | 16.9 (0.75)     | 16.757 (0.309)  | 16.7 (0.375)      | 0.31                     |
| Neu       | 3.34 (1.16)    | 3.29 (1.222)     | 3.79 (1.40)    | 3.475 (0.927)   | 4.16 (2.14)     | 3.75 (1.748)      | 0.155                    |
| Lym       | 1.91 (0.55)    | 1.82 (0.607)     | 1.86 (0.57)    | 1.84 (0.8)      | 1.49 (0.60)     | 1.48 (0.968)      | <b>0.014<sup>a</sup></b> |
| Neu/Lym   | 1.85 (0.68)    | 1.795 (0.995)    | 2.24 (1.11)    | 2.15 (1.08)     | 3.42 (2.51)     | 2.515 (2.23)      | <b>0.005<sup>f</sup></b> |
| Plt/Lym   | 139.87 (43.82) | 132.345 (63.752) | 149.16 (66.38) | 143.23 (80.91)  | 227.66 (2.2.92) | 173.545 (108.295) | <b>0.016<sup>g</sup></b> |
| CD3+T     | -              | -                | 1.43 (0.48)    | 1.406 (0.764)   | 1.11 (0.51)     | 1.024 (0.528)     | <b>0.015</b>             |
| CD4+T     | -              | -                | 0.92 (0.29)    | 0.892 (0.43475) | 0.73 (0.38)     | 0.653 (0.322)     | <b>0.043</b>             |
| CD8+T     | -              | -                | 0.47 (0.25)    | 0.405 (0.291)   | 0.34 (0.18)     | 0.336 (0.257)     | <b>0.028</b>             |
| CD4/CD8   | -              | -                | 2.32 (0.95)    | 2.315 (1.31)    | 2.50 (1.42)     | 2.34 (1.5)        | 0.903                    |
| CD19+B    | -              | -                | 0.30 (0.15)    | 0.275 (0.17)    | 0.22 (0.13)     | 0.223 (0.128)     | <b>0.025</b>             |
| CD16/CD56 | -              | -                | 0.22 (0.11)    | 0.171 (0.146)   | 0.21 (0.87)     | 0.189 (0.135)     | 0.860                    |

IQR=interquartile range; MS=multiple sclerosis; SD=standard deviation; for the abbreviations and units of all laboratory parameters, see Supplementary Table 1.

<sup>o</sup> In the context of vitamin assessment, data were available in 57 subjects for Vit A, K, E (22 controls, 18 remitting- and 17 relapsing- MS patients) and in 37 subjects for Vit D (11 controls, 4 remitting MS, 22 relapsing MS patients).

<sup>\*</sup> Kruskal-Wallis or ANOVA according to the variable distribution

Significant differences are reported in bold; statistically significant post-hoc analysis details are described below:

<sup>a</sup>  $P=0.042$  for controls vs Remitting-MS;  $p=0.001$  for controls vs Relapsing-MS

<sup>b</sup>  $P=0.002$  for controls vs Remitting-MS;  $p=0.008$  for controls vs Relapsing-MS;  $p=0.039$  for Relapsing-MS vs Remitting-MS

<sup>c</sup>  $P=0.022$  for controls vs Remitting-MS;  $p=0.017$  for controls vs Relapsing-MS

<sup>d</sup>  $P=0.005$  for Relapsing-MS vs Remitting-MS

<sup>e</sup>  $P<0.001$  for Relapsing-MS vs controls;  $p<0.001$  for Relapsing-MS vs Remitting-MS

<sup>f</sup>  $P<0.001$  for Relapsing-MS vs controls;  $p=0.032$  for Relapsing-MS vs Remitting-MS

<sup>g</sup>  $P=0.013$  for Relapsing-MS vs controls;  $p=0.032$  for Relapsing-MS vs Remitting-MS

<sup>h</sup>  $P<0.001$  for Relapsing-MS vs controls;  $p<0.001$  for Relapsing-MS vs Remitting-MS

<sup>i</sup>  $P<0.001$  for Relapsing-MS vs controls;  $p<0.001$  for Relapsing-MS vs Remitting-MS

<sup>l</sup>  $P=0.017$  for controls vs Remitting-MS;  $p=0.011$  for controls vs Relapsing-MS

<sup>m</sup>  $P=0.037$  for controls vs Remitting-MS;  $p=0.037$  for controls vs Relapsing-MS

<sup>n</sup>  $P=0.014$  for Relapsing-MS vs Remitting-MS

<sup>o</sup>  $P=0.014$  for Relapsing-MS vs controls;  $p=0.038$  for Relapsing-MS vs Remitting-MS

<sup>p</sup>  $P=0.023$  for Relapsing-MS vs Remitting-MS

<sup>q</sup>  $P=0.020$  for Relapsing-MS vs controls;  $p=0.047$  for Relapsing-MS vs Remitting-MS

<sup>r</sup>  $P=0.002$  for Relapsing-MS vs controls;  $p=0.049$  for Relapsing-MS vs Remitting-MS

<sup>s</sup>  $P=0.025$  for Relapsing-MS vs controls;  $p=0.026$  for Relapsing-MS vs Remitting-MS

Subgroup analysis by sex on laboratory markers were also performed. Between-sex differences in laboratory biomarkers for the entire cohort and patients only are reported in Supplementary Table 4.

#### Supplementary Table 4. Between-sex differences in laboratory biomarkers in the entire cohort and in relapsing- and remitting-multiple sclerosis patients' groups only.

|                                  |          | All subjects (N=90) |               |              |                  | Patients only (N=60) |                |              |                  |
|----------------------------------|----------|---------------------|---------------|--------------|------------------|----------------------|----------------|--------------|------------------|
|                                  |          | N                   | Mean (SD)     | Median (IQR) | p-value          | n                    | Mean (SD)      | Median (IQR) | P-value          |
| <b>RBC (ccx10<sup>9</sup>/L)</b> | <b>F</b> | 70                  | 4.52 (0.35)   | 4.49 (0.413) | <b>&lt; .001</b> | 47                   | 4.473 (0.336)  | 4.47 (0.475) | <b>&lt;0.001</b> |
|                                  | <b>M</b> | 20                  | 5.02 (0.36)   | 5.01 (0.462) |                  | 13                   | 5.022 (0.409)  | 4.95 (0.56)  |                  |
| <b>PLT (ccx10<sup>9</sup>/L)</b> | <b>F</b> | 70                  | 261.21 (62.1) | 249 (76.75)  | <b>0.042</b>     | 47                   | 263.9 (60.49)  | 249 (75)     | <b>0.016</b>     |
|                                  | <b>M</b> | 20                  | 223.4 (55.89) | 226 (94.25)  |                  | 13                   | 215.08 (55.52) | 207 (90)     |                  |
| <b>Hb (g/L)</b>                  | <b>F</b> | 70                  | 13.37 (1.043) | 13.35 (1.15) | <b>&lt; .001</b> | 47                   | 13.238 (1.091) | 13.1 (1.25)  | <b>&lt;0.001</b> |
|                                  | <b>M</b> | 20                  | 14.98 (0.86)  | 14.95 (1.25) |                  | 13                   | 14.754 (0.867) | 14.7 (0.8)   |                  |
| <b>Htc (%)</b>                   | <b>F</b> | 70                  | 40.40 (2.9)   | 40.35 (2.87) | <b>&lt; .001</b> | 47                   | 39.981 (3.06)  | 40 (3.85)    | <b>&lt;0.001</b> |

|                     |   |    |                |                |        |    |                |                |        |
|---------------------|---|----|----------------|----------------|--------|----|----------------|----------------|--------|
|                     | M | 20 | 44.78 (2.61)   | 44.9 (4.47)    |        | 13 | 44.015 (2.561) | 43.3 (2.9)     |        |
| MCHC (g/L)          | F | 70 | 33.08 (0.76)   | 33 (0.87)      | 0.025  | 47 | 33.104 (0.704) | 32.9 (0.8)     | 0.063  |
|                     | M | 20 | 33.48 (0.687)  | 33.55 (1)      |        | 13 | 33.546 (0.816) | 33.6 (1)       |        |
|                     | F | 70 | 13.66 (0.90)   | 13.5 (0.87)    |        | 47 | 13.709 (0.946) | 13.5 (1)       |        |
| RDW (%)             | M | 20 | 13.17 (0.63)   | 13.1 (0.72)    | 0.027  | 13 | 13.131 (0.733) | 13 (0.7)       | 0.024  |
|                     | F | 69 | 183.5 (143.6)  | 155.23 (82.39) |        | 46 | 204.01 (169.9) | 171.47 (71.8)  |        |
| PLR                 | M | 20 | 134.67 (62.24) | 109.49 (59.77) | 0.015  | 13 | 136.26 (72.01) | 109.13 (20.96) | 0.019  |
|                     | F | 69 | 95.304 (11.26) | 96 (13)        |        | 46 | 96.043 (10.82) | 96.5 (12)      |        |
| PT%                 | M | 20 | 100.95 (8.92)  | 101 (10)       | 0.029  | 13 | 97.769 (8.861) | 96 (10)        | 0.621  |
|                     | F | 70 | 1.042 (0.086)  | 1.035 (0.1)    |        | 47 | 1.036 (0.08)   | 1.03 (0.09)    |        |
| PT (seconds)        | M | 20 | 0.999 (0.059)  | 0.99 (0.07)    | 0.024  | 13 | 1.019 (0.062)  | 1.03 (0.07)    | 0.565  |
|                     | F | 70 | 267.93 (132.8) | 241 (127.5)    |        | 47 | 292.39 (143.7) | 254 (143)      |        |
| DD (ng/ml)          | M | 20 | 241.5 (223.39) | 178.5 (115)    | 0.033  | 13 | 282 (266.332)  | 183 (170)      | 0.114  |
|                     | F | 70 | 83.614 (17.12) | 88 (21.25)     |        | 47 | 81.723 (18.75) | 89 (26)        |        |
| PS (%)              | M | 20 | 96.15 (20.08)  | 103.5 (28.5)   | 0.006  | 13 | 91.385 (22.16) | 96 (36)        | 0.125  |
|                     | F | 67 | 100.3 (12.34)  | 100 (13.5)     |        | 47 | 100.3 (12.96)  | 100 (13)       |        |
| FII (%)             | M | 20 | 107.25 (11.58) | 106 (5.5)      | 0.006  | 13 | 107.23 (13.74) | 106 (10)       | 0.038  |
|                     | F | 62 | 83.085 (22.14) | 82.5 (28.2)    |        | 44 | 85.29 (19.85)  | 83.9 (26.675)  |        |
| FVII (%)            | M | 16 | 105.64 (24.78) | 102.5 (21.55)  | 0.002  | 12 | 106.6 (28.609) | 99.55 (34.275) | 0.027  |
|                     | F | 70 | 111.69 (20.83) | 109.5 (25.25)  |        | 47 | 114.47 (22.86) | 113 (30)       |        |
| C3 (mg/dl)          | M | 20 | 123.4 (15.132) | 122.5 (26.5)   | 0.007  | 13 | 125.69 (15.9)  | 126 (29)       | 0.045  |
|                     | F | 68 | 4.713 (7.339)  | 2.3 (2.7)      |        | 45 | 4.249 (7.335)  | 2.3 (2.7)      |        |
| Anti-ptb IgM (U/ml) | M | 20 | 4.225 (10.909) | 1.6 (1.075)    | 0.01   | 13 | 5.2 (13.59)    | 1.5 (0.8)      | 0.007  |
|                     | F | 68 | 1.876 (4.62)   | 1.1 (0.8)      |        | 45 | 1.344 (1.183)  | 1.1 (0.7)      |        |
| Anti-ann IgM (U/ml) | M | 20 | 0.81 (0.445)   | 0.8 (0.7)      | 0.019  | 13 | 0.738 (0.336)  | 0.8 (0.4)      | 0.009  |
|                     | F | 66 | 4.559 (4.204)  | 3.3 (2.85)     |        | 43 | 3.643 (2.625)  | 2.8 (1.15)     |        |
| C4 (mg/dl)          | M | 20 | 2.97 (1.722)   | 2.3 (1.85)     | 0.011  | 13 | 2.308 (1.621)  | 1.9 (0.6)      | <0.001 |
|                     | F | 70 | 90.85 (14.21)  | 88.9 (18.725)  |        | 47 | 92.906 (15.04) | 92 (18.55)     |        |
| FX (%)              | M | 20 | 99.22 (13.56)  | 98.6 (14.05)   | 0.014  | 13 | 101.93 (12.36) | 101 (17.7)     | 0.043  |
|                     | F | 68 | 1.71 (1.23)    | 1.28 (1.04)    |        | 47 | 1.735 (1.21)   | 1.29 (1.035)   |        |
| EB IgA (U/ml)       | M | 20 | 0.999 (0.39)   | 1.095 (0.358)  | 0.006  | 13 | 1.048 (0.305)  | 1.1 (0.22)     | 0.027  |
|                     | F | 68 | 5.281 (5.071)  | 4 (2.925)      |        | 47 | 4.128 (1.977)  | 3.7 (2.55)     |        |
| EB IgM (U/ml)       | M | 20 | 3.58 (2.57)    | 2.8 (1.975)    | 0.018  | 13 | 3.938 (3.059)  | 2.7 (2.3)      | 0.247  |
|                     | F | 68 | 7.435 (8.895)  | 5.8 (3.35)     |        | 47 | 7.164 (9.472)  | 5.9 (3.1)      |        |
| EBV-VCA IgM (U/ml)  | M | 20 | 4.87 (3.217)   | 3.8 (3.9)      | 0.021  | 13 | 4.385 (2.669)  | 3.8 (2.9)      | 0.026  |
|                     | F | 68 | 4.525 (3.982)  | 2.85 (2.775)   |        | 47 | 4.251 (3.805)  | 2.7 (3)        |        |
| HS 1 IgM (DU)       | M | 20 | 2.915 (2.424)  | 1.95 (1.675)   | 0.016  | 13 | 2.754 (2.666)  | 1.7 (0.7)      | 0.023  |
|                     | F | 68 | 21.8 (51.79)   | 5.45 (10.65)   |        | 47 | 17.913 (51.79) | 4.6 (7.3)      |        |
| Cyt IgM (DU)        | M | 20 | 5.76 (16.851)  | 1.05 (1.75)    | < .001 | 13 | 7.838 (20.797) | 1 (2.4)        | 0.019  |
|                     | F | 68 | 6.628 (4.911)  | 5.45 (3.825)   |        | 47 | 5.638 (2.379)  | 5.2 (3.3)      |        |
| Myc IgM (DU)        | M | 20 | 4.805 (2.473)  | 3.85 (2.35)    | 0.016  | 13 | 4.215 (1.364)  | 3.7 (0.9)      | 0.053  |
|                     | F | 68 | 16.999 (5.082) | 17.8 (4.25)    |        | 47 | 17.068 (5.345) | 17.8 (3.9)     |        |
| Var IgG (DU)        | M | 20 | 19.03 (3.382)  | 19.65 (3.825)  | 0.04   | 13 | 19.685 (2.995) | 20.4 (5.3)     | 0.057  |
|                     | F | 68 | 4.644 (2.007)  | 3.85 (2.225)   |        | 47 | 4.523 (2.071)  | 3.6 (2)        |        |
| Sch IgG (DU)        | M | 20 | 3.84 (1.23)    | 3.45 (1.4)     | 0.091  | 13 | 3.523 (1.102)  | 3.2 (1.1)      | 0.043  |
|                     | M | -  | -              | -              |        | 13 | 20.615 (5.44)  | 19 (4)         |        |
|                     | M | -  | -              | -              |        | 13 | 27.85 (17.53)  | 22 (8)         |        |
|                     | M | -  | -              | -              |        | 13 | 27.85 (17.53)  | 22 (8)         |        |

Anti-ann=anti-annexin; Anti-ptb IgM=anti-prothrombin; C3=complement component 3; C4=complement component 4; Cyt=Cytomegalovirus; DD=D-dimer; F=females; EB=Epstein-Barr; EBV-VCA=Epstein Barr Virus-Viral Capsid Antigen; Hb=hemoglobin; FII=factor II; FVII=factor VII; FX=Factor XHtc=hematocrit; HS 1=Herpes Simplex Type 1; M=males; MCHC=Mean Corpuscular Hemoglobin Concentration; Myc=Mycoplasma; NLR=neutrophil-to-lymphocyte ratio; PLT=platelets; PLR=platelets-to-lymphocytes ratio; PS=protein S; PT=prothrombin time; RBC=red blood cells; RDW=Red blood cells Distribution Width; Sch=Schistosoma; Var=Varicella.

Differences are calculated by Mann-Whitney U-test; statistically significant differences (p<0.05) are in bold.

Differences in terms of MRI metrics between relapsing- and remitting patients are reported in Supplementary Table 5.

**Supplementary Table 5. Radiological (MRI) metrics in the relapsing- and remitting-multiple sclerosis patients' groups**

|                                          |           | Median  | IQR    | P-value             |
|------------------------------------------|-----------|---------|--------|---------------------|
| <b>Lesion analyses</b>                   |           |         |        |                     |
| <b>FLAIR lesion volume (ml)</b>          | Remitting | 4.018   | 9.064  | 0.429               |
|                                          | Relapsing | 5.573   | 6.688  |                     |
| <b>N° of FLAIR lesions</b>               | Remitting | 31      | 30     | 0.879               |
|                                          | Relapsing | 28.5    | 30.25  |                     |
| <b>T1 lesion volume (ml)</b>             | Remitting | 2.237   | 5.092  | 0.49                |
|                                          | Relapsing | 2.766   | 3.409  |                     |
| <b>N° of T1 lesions</b>                  | Remitting | 23      | 24     | 1                   |
|                                          | Relapsing | 21.5    | 24.25  |                     |
| <b>Active (Gd+) lesion volume (ml)</b>   | Remitting | 0       | 0      | <b>&lt;0.001***</b> |
|                                          | Relapsing | 0.021   | 0.195  |                     |
| <b>N° of active (Gd+) lesions</b>        | Remitting | 0       | 0      | <b>&lt;0.001***</b> |
|                                          | Relapsing | 1       | 1      |                     |
| <b>Lesion perfusion metrics</b>          |           |         |        |                     |
| <b>FLAIR LESIONS</b>                     |           |         |        |                     |
| <b>MTT FLAIR lesions</b>                 | Remitting | 5.727   | 0.61   | 0.496               |
|                                          | Relapsing | 5.911   | 1.102  |                     |
| <b>MTT leakage* FLAIR lesions</b>        | Remitting | 5.496   | 0.537  | 0.692               |
|                                          | Relapsing | 5.542   | 1.041  |                     |
| <b>CBV FLAIR lesions</b>                 | Remitting | 13.873  | 3.985  | 0.322               |
|                                          | Relapsing | 11.504  | 3.753  |                     |
| <b>CBV leakage* FLAIR lesions</b>        | Remitting | 13.53   | 8.054  | 0.361               |
|                                          | Relapsing | 10.954  | 3.731  |                     |
| <b>CBF FLAIR lesions</b>                 | Remitting | 133.592 | 60.583 | 0.172               |
|                                          | Relapsing | 124.459 | 26.469 |                     |
| <b>CBF leakage* FLAIR lesions</b>        | Remitting | 134.468 | 53.225 | 0.175               |
|                                          | Relapsing | 124.982 | 29.539 |                     |
| <b>ACTIVE (GD+) LESIONS</b>              |           |         |        |                     |
| <b>MTT active (Gd+) lesions</b>          | Remitting | 4.192   | 0.328  | 0.522               |
|                                          | Relapsing | 6.136   | 2.968  |                     |
| <b>MTT leakage* active (Gd+) lesions</b> | Remitting | 4.192   | 0.328  | 0.302               |
|                                          | Relapsing | 5.842   | 2.057  |                     |
| <b>CBV active (Gd+) lesions</b>          | Remitting | 16.182  | 3.881  | 0.571               |
|                                          | Relapsing | 15.268  | 7.914  |                     |
|                                          | Remitting | 15.773  | 3.411  | 0.7                 |

|                                                               |           |         |        |               |
|---------------------------------------------------------------|-----------|---------|--------|---------------|
| <b>CBV leakage* active (Gd+) lesions</b>                      | Relapsing | 14.624  | 7.98   |               |
| <b>CBF active (Gd+) lesions</b>                               | Remitting | 237.624 | 73.894 | 0.106         |
|                                                               | Relapsing | 138.681 | 23.385 |               |
| <b>CBF leakage* active (Gd+) lesions</b>                      | Remitting | 230.98  | 67.23  | 0.131         |
|                                                               | Relapsing | 136.807 | 47.851 |               |
| <b>Normal appearing white matter (NAWM) perfusion metrics</b> |           |         |        |               |
| <b>MTT NAWM</b>                                               | Remitting | 5.57    | 1.43   | 0.398         |
|                                                               | Relapsing | 5.323   | 0.886  |               |
| <b>MTT leakage NAWM</b>                                       | Remitting | 5.286   | 1.27   | 0.846         |
|                                                               | Relapsing | 5.299   | 0.962  |               |
| <b>CBV NAWM</b>                                               | Remitting | 14.994  | 3.786  | <b>0.047*</b> |
|                                                               | Relapsing | 12.766  | 3.673  |               |
| <b>CBV leakage NAWM</b>                                       | Remitting | 13.178  | 3.891  | 0.129         |
|                                                               | Relapsing | 12.348  | 2.496  |               |
| <b>CBF NAWM</b>                                               | Remitting | 154.698 | 51.354 | 0.099         |
|                                                               | Relapsing | 140.974 | 49.49  |               |
| <b>CBF leakage NAWM</b>                                       | Remitting | 153.449 | 51.794 | 0.088         |
|                                                               | Relapsing | 140.738 | 48.514 |               |
| <b>Caudate perfusion metrics</b>                              |           |         |        |               |
| <b>RIGHT (R-) CAUDATE</b>                                     |           |         |        |               |
| <b>MTT R-caudate</b>                                          | Remitting | 5.594   | 1.243  | 0.293         |
|                                                               | Relapsing | 5.835   | 1.234  |               |
| <b>MTT leakage* R-caudate</b>                                 | Remitting | 5.249   | 1.197  | 0.147         |
|                                                               | Relapsing | 5.751   | 1.078  |               |
| <b>CBV R-caudate</b>                                          | Remitting | 20.397  | 10.458 | 0.246         |
|                                                               | Relapsing | 18.84   | 6.08   |               |
| <b>CBV leakage* R-caudate</b>                                 | Remitting | 19.37   | 4.301  | 0.685         |
|                                                               | Relapsing | 18.871  | 5.288  |               |
| <b>CBF R-caudate</b>                                          | Remitting | 207.29  | 37.807 | 0.178         |
|                                                               | Relapsing | 197.017 | 54.449 |               |
| <b>CBF leakage* R-caudate</b>                                 | Remitting | 206.227 | 40.367 | 0.246         |
|                                                               | Relapsing | 200.48  | 48.808 |               |
| <b>LEFT (L-) CAUDATE</b>                                      |           |         |        |               |
| <b>MTT L-caudate</b>                                          | Remitting | 6.066   | 2.002  | 0.317         |
|                                                               | Relapsing | 6.567   | 1.889  |               |
| <b>MTT leakage* L-caudate</b>                                 | Remitting | 5.416   | 2.035  | 0.658         |
|                                                               | Relapsing | 5.593   | 1.447  |               |
| <b>CBV L-caudate</b>                                          | Remitting | 19.07   | 14.77  | <b>0.044*</b> |
|                                                               | Relapsing | 16.354  | 7.597  |               |
| <b>CBV leakage* L-caudate</b>                                 | Remitting | 17.188  | 7.112  | 0.48          |
|                                                               | Relapsing | 16.936  | 6.403  |               |
| <b>CBF L-caudate</b>                                          | Remitting | 188.196 | 46.648 | 0.231         |
|                                                               | Relapsing | 172.806 | 66.508 |               |
| <b>CBF leakage* L-caudate</b>                                 | Remitting | 192.288 | 44.145 | 0.27          |
|                                                               | Relapsing | 172.929 | 57.527 |               |

| <b>GLOBAL CAUDATE</b>             |           |         |        |       |
|-----------------------------------|-----------|---------|--------|-------|
| <b>MTT caudate</b>                | Remitting | 6.072   | 1.411  | 0.348 |
|                                   | Relapsing | 6.298   | 1.393  |       |
| <b>MTT leakage* caudate</b>       | Remitting | 5.062   | 1.429  | 0.231 |
|                                   | Relapsing | 5.591   | 1.116  |       |
| <b>CBV caudate</b>                | Remitting | 19.071  | 8.381  | 0.178 |
|                                   | Relapsing | 16.125  | 5.098  |       |
| <b>CBV leakage* caudate</b>       | Remitting | 18.299  | 5.354  | 0.685 |
|                                   | Relapsing | 18.316  | 5.226  |       |
| <b>CBF caudate</b>                | Remitting | 200.591 | 51.113 | 0.228 |
|                                   | Relapsing | 189.019 | 52.784 |       |
| <b>CBF leakage* caudate</b>       | Remitting | 204.331 | 48.564 | 0.246 |
|                                   | Relapsing | 190.769 | 45.443 |       |
| <b>Thalamus perfusion metrics</b> |           |         |        |       |
| <b>RIGHT (R-) THALAMUS</b>        |           |         |        |       |
| <b>MTT R-thalamus</b>             | Remitting | 4.894   | 1.07   | 0.65  |
|                                   | Relapsing | 4.821   | 0.767  |       |
| <b>MTT leakage* R-thalamus</b>    | Remitting | 4.894   | 1.248  | 0.468 |
|                                   | Relapsing | 5.002   | 0.778  |       |
| <b>CBV R-thalamus</b>             | Remitting | 20.784  | 10.012 | 0.122 |
|                                   | Relapsing | 16.649  | 4.947  |       |
| <b>CBV leakage* R-thalamus</b>    | Remitting | 19.144  | 5.502  | 0.381 |
|                                   | Relapsing | 17.46   | 4.598  |       |
| <b>CBF R-thalamus</b>             | Remitting | 221.435 | 64.725 | 0.144 |
|                                   | Relapsing | 202.024 | 54.967 |       |
| <b>CBF leakage* R-thalamus</b>    | Remitting | 220.05  | 68.056 | 0.224 |
|                                   | Relapsing | 206.132 | 43.899 |       |
| <b>LEFT (L-) THALAMUS</b>         |           |         |        |       |
| <b>MTT L-thalamus</b>             | Remitting | 4.922   | 1.027  | 0.893 |
|                                   | Relapsing | 4.878   | 0.762  |       |
| <b>MTT leakage* L-thalamus</b>    | Remitting | 4.983   | 1.081  | 0.843 |
|                                   | Relapsing | 5.004   | 0.853  |       |
| <b>CBV L-thalamus</b>             | Remitting | 18.27   | 5.855  | 0.371 |
|                                   | Relapsing | 16.628  | 5.314  |       |
| <b>CBV leakage* L-thalamus</b>    | Remitting | 19.911  | 4.649  | 0.246 |
|                                   | Relapsing | 18.218  | 5.3    |       |
| <b>CBF L-thalamus</b>             | Remitting | 243.271 | 60.798 | 0.262 |
|                                   | Relapsing | 207.982 | 50.358 |       |
| <b>CBF leakage* L-thalamus</b>    | Remitting | 240.425 | 54.105 | 0.337 |
|                                   | Relapsing | 209.138 | 44.846 |       |
| <b>GLOBAL THALAMUS</b>            |           |         |        |       |
| <b>MTT thalamus</b>               | Remitting | 4.893   | 1.17   | 0.959 |
|                                   | Relapsing | 4.931   | 0.649  |       |
| <b>MTT leakage* thalamus</b>      | Remitting | 4.939   | 1.001  | 0.943 |
|                                   | Relapsing | 5.003   | 0.903  |       |
| <b>CBV thalamus</b>               | Remitting | 19.345  | 5.919  | 0.129 |

|                                          |           |         |        |       |
|------------------------------------------|-----------|---------|--------|-------|
|                                          | Relapsing | 16.631  | 4.596  |       |
| <b>CBV leakage* thalamus</b>             | Remitting | 19.528  | 4.621  | 0.226 |
|                                          | Relapsing | 17.839  | 5.311  |       |
| <b>CBF thalamus</b>                      | Remitting | 233.631 | 57.071 | 0.166 |
|                                          | Relapsing | 204.775 | 50.485 |       |
| <b>CBF leakage* thalamus</b>             | Remitting | 232.044 | 57.092 | 0.197 |
|                                          | Relapsing | 206.665 | 37.665 |       |
| <b>Globus pallidus perfusion metrics</b> |           |         |        |       |
| <b>RIGHT (R-) GLOBUS PALLIDUS</b>        |           |         |        |       |
| <b>MTT R-globus pallidus</b>             | Remitting | 4.65    | 0.948  | 0.177 |
|                                          | Relapsing | 5.037   | 0.889  |       |
| <b>MTT leakage* R-globus pallidus</b>    | Remitting | 4.681   | 0.912  | 0.371 |
|                                          | Relapsing | 4.808   | 1.025  |       |
| <b>CBV R-globus pallidus</b>             | Remitting | 14.565  | 1.671  | 0.727 |
|                                          | Relapsing | 15.381  | 4.792  |       |
| <b>CBV leakage* R-globus pallidus</b>    | Remitting | 14.218  | 2.518  | 0.749 |
|                                          | Relapsing | 14.426  | 4.749  |       |
| <b>CBF R-globus pallidus</b>             | Remitting | 186.183 | 37.836 | 0.522 |
|                                          | Relapsing | 170.683 | 67.317 |       |
| <b>CBF leakage* R-globus pallidus</b>    | Remitting | 185.686 | 42.993 | 0.651 |
|                                          | Relapsing | 170.092 | 55.73  |       |
| <b>LEFT (L-) GLOBUS PALLIDUS</b>         |           |         |        |       |
| <b>MTT L-globus pallidus</b>             | Remitting | 4.682   | 1.019  | 0.24  |
|                                          | Relapsing | 5.045   | 1.012  |       |
| <b>MTT leakage* L-globus pallidus</b>    | Remitting | 4.649   | 0.941  | 0.401 |
|                                          | Relapsing | 4.839   | 0.91   |       |
| <b>CBV L-globus pallidus</b>             | Remitting | 14.847  | 3.351  | 0.644 |
|                                          | Relapsing | 15.37   | 4.965  |       |
| <b>CBV leakage* L-globus pallidus</b>    | Remitting | 14.325  | 3.356  | 0.947 |
|                                          | Relapsing | 13.862  | 3.948  |       |
| <b>CBF L-globus pallidus</b>             | Remitting | 183.80  | 30.351 | 0.468 |
|                                          | Relapsing | 172.719 | 70.4   |       |
| <b>CBF leakage* L-globus pallidus</b>    | Remitting | 187.223 | 36.663 | 0.578 |
|                                          | Relapsing | 172.798 | 69.284 |       |
| <b>GLOBAL GLOBUS PALLIDUS</b>            |           |         |        |       |
| <b>MTT globus pallidus</b>               | Remitting | 4.818   | 1.183  | 0.695 |
|                                          | Relapsing | 5.008   | 0.939  |       |
| <b>MTT leakage* globus pallidus</b>      | Remitting | 4.778   | 0.835  | 0.304 |
|                                          | Relapsing | 5.048   | 1.016  |       |
| <b>CBV globus pallidus</b>               | Remitting | 15.659  | 2.98   | 0.224 |
|                                          | Relapsing | 14.636  | 4.008  |       |
| <b>CBV leakage* globus pallidus</b>      | Remitting | 14.65   | 4.205  | 0.54  |
|                                          | Relapsing | 14.256  | 4.129  |       |
| <b>CBF globus pallidus</b>               | Remitting | 184.991 | 30.151 | 0.268 |
|                                          | Relapsing | 171.701 | 70.200 |       |
|                                          | Remitting | 191.419 | 45.05  | 0.231 |

|                                     |           |         |        |               |
|-------------------------------------|-----------|---------|--------|---------------|
| <b>CBF leakage* globus pallidus</b> | Relapsing | 168.645 | 40.836 |               |
| <b>Putamen perfusion metrics</b>    |           |         |        |               |
| <b>RIGHT (R-) PUTAMEN</b>           |           |         |        |               |
| <b>MTT R-putamen</b>                | Remitting | 4.801   | 1.065  | 0.821         |
|                                     | Relapsing | 4.794   | 0.991  |               |
| <b>MTT leakage* R-putamen</b>       | Remitting | 4.798   | 1.235  | 0.486         |
|                                     | Relapsing | 4.765   | 1.085  |               |
| <b>CBV R-putamen</b>                | Remitting | 16.856  | 1.879  | 0.785         |
|                                     | Relapsing | 16.981  | 4.022  |               |
| <b>CBV leakage* R-putamen</b>       | Remitting | 20.511  | 4.161  | 0.217         |
|                                     | Relapsing | 19.568  | 4.886  |               |
| <b>CBF R-putamen</b>                | Remitting | 241.971 | 51.901 | <b>0.037*</b> |
|                                     | Relapsing | 222.19  | 44.211 |               |
| <b>CBF leakage* R-putamen</b>       | Remitting | 240.525 | 54.948 | 0.069         |
|                                     | Relapsing | 222.099 | 44.724 |               |
| <b>LEFT (L-) PUTAMEN</b>            |           |         |        |               |
| <b>MTT L-putamen</b>                | Remitting | 4.824   | 1.273  | 0.359         |
|                                     | Relapsing | 4.877   | 0.764  |               |
| <b>MTT leakage* L-putamen</b>       | Remitting | 4.775   | 1.29   | 0.371         |
|                                     | Relapsing | 4.903   | 0.825  |               |
| <b>CBV L-putamen</b>                | Remitting | 17.812  | 5.065  | 0.197         |
|                                     | Relapsing | 16.722  | 3.819  |               |
| <b>CBV leakage* L-putamen</b>       | Remitting | 19.916  | 4.513  | 0.149         |
|                                     | Relapsing | 18.451  | 5.323  |               |
| <b>CBF L-putamen</b>                | Remitting | 243.1   | 68.018 | <b>0.028*</b> |
|                                     | Relapsing | 218.517 | 45.979 |               |
| <b>CBF leakage* L-putamen</b>       | Remitting | 245.098 | 71.643 | 0.093         |
|                                     | Relapsing | 225.901 | 49.75  |               |
| <b>GLOBAL PUTAMEN</b>               |           |         |        |               |
| <b>MTT putamen</b>                  | Remitting | 4.813   | 1.298  | 0.523         |
|                                     | Relapsing | 4.81    | 0.883  |               |
| <b>MTT leakage* putamen</b>         | Remitting | 4.787   | 1.217  | 0.391         |
|                                     | Relapsing | 4.885   | 0.883  |               |
| <b>CBV putamen</b>                  | Remitting | 17.452  | 3.417  | 0.888         |
|                                     | Relapsing | 17.396  | 3.847  |               |
| <b>CBV leakage* putamen</b>         | Remitting | 19.961  | 3.449  | 0.356         |
|                                     | Relapsing | 19.115  | 4.755  |               |
| <b>CBF putamen</b>                  | Remitting | 241.265 | 65.233 | 0.088         |
|                                     | Relapsing | 223.309 | 52.828 |               |
| <b>CBF leakage* putamen</b>         | Remitting | 243.357 | 65.537 | 0.178         |
|                                     | Relapsing | 226.166 | 45.974 |               |

CBF=cerebral blood flow; CBV=cerebral blood volume; FLAIR=fluid-attenuated inversion recovery; Gd+=gadolinium enhancing; L=left; MTT=mean transit time; NAWM=normal-appearing white matter; R=right.

\* leakage correction analysis (corrected for contrast agent extravasation).

Differences were calculated by Mann-Whitney test. Statistically significant p-values are reported in bold.

Correlations between patients' demographic/clinical features, laboratory and MRI data with  $\rho > 0.5$  and  $p < 0.05$  are shown in Supplementary Table 6.

**Supplementary Table 6. Correlations (Spearman's  $\rho \geq 0.5$ ,  $P$ -value  $< 0.05$ ) between demographic/clinical characteristics, laboratory biomarkers and radiological (MRI) metrics.**

| Variable 1                                                        | Variable 2                                   | Spearman's rho | P-value |
|-------------------------------------------------------------------|----------------------------------------------|----------------|---------|
| <i>Correlations between demographics/clinical characteristics</i> |                                              |                |         |
| Age                                                               | Age at onset                                 | 0.649          | <0.0001 |
| Number of relapses in the previous 24 months                      | Number of relapses in the previous 12 months | 0.915          | <0.0001 |
| Total number of relapses                                          | EDSS at baseline                             | 0.654          | <0.0001 |
| Z_SCORE_9-HPT                                                     | MSFC                                         | 0.858          | <0.0001 |
| Z_SCORE_PASAT_3"                                                  | MSFC                                         | 0.805          | <0.0001 |
| EDSS at baseline                                                  | Z_SCORE_9-HPT                                | -0.594         | <0.0001 |
| EDSS at baseline                                                  | MSFC                                         | -0.571         | <0.0001 |
| <i>Correlations between laboratory biomarkers</i>                 |                                              |                |         |
| Anti-Beta2_GPI_IgG                                                | Anti-Beta2_GPI_IgM                           | 0.560          | <0.0001 |
| Anti-cardiolipin GPI_IgG                                          | Anti-Beta2_GPI_IgG                           | 0.608          | <0.0001 |
| Anti-cardiolipin_IgM                                              | Anti-Beta2_GPI_IgG                           | 0.516          | <0.0001 |
| Anti-cardiolipin_IgM                                              | Anti-Beta2_GPI_IgM                           | 0.872          | <0.0001 |
| APTT                                                              | vWF                                          | -0.535         | <0.0001 |
| APTT                                                              | aPTT-ratio                                   | 0.982          | <0.0001 |
| C3                                                                | FX                                           | 0.685          | <0.0001 |
| Chlamydia_IgG                                                     | Chlamydia IgA                                | 0.726          | <0.0001 |
| Creatinin                                                         | eGFR                                         | -0.751         | <0.0001 |
| Creatinin                                                         | Vitamin D                                    | 0.550          | 0.0029  |
| EBV-VCA_IgM                                                       | Mycoplasma_IgM                               | 0.531          | <0.0001 |
| EBV-VCA_IgM                                                       | HerpesSimplexType1_IgM                       | 0.694          | <0.0001 |
| Epstein-Barr_IgM                                                  | HerpesSimplexType1_IgM                       | 0.527          | <0.0001 |
| FIB                                                               | C3                                           | 0.563          | <0.0001 |
| FII                                                               | C3                                           | 0.507          | <0.0001 |
| FII                                                               | FVII                                         | 0.522          | <0.0001 |
| FVIII                                                             | vWF                                          | 0.845          | <0.0001 |
| WBC                                                               | Neu                                          | 0.862          | <0.0001 |
| RBC                                                               | Hb                                           | 0.650          | <0.0001 |
| RBC                                                               | Htc                                          | 0.710          | <0.0001 |
| Hb                                                                | Htc                                          | 0.964          | <0.0001 |
| HerpesSimplexType1_IgM                                            | Cytomegalovirus_IgM                          | 0.571          | <0.0001 |
| HerpesSimplexType1-2_IgG                                          | HerpesSimplexType1_IgG                       | 0.886          | <0.0001 |
| HerpesSimplexType1-2_IgM                                          | HerpesSimplexType2_IgM                       | 0.901          | <0.0001 |
| InfluenzaA_IgM                                                    | InfluenzaB_IgM                               | 0.846          | <0.0001 |
| MCHC                                                              | RDW                                          | -0.560         | <0.0001 |
| MCV                                                               | MHC                                          | 0.895          | <0.0001 |
| MHC                                                               | RDW                                          | -0.573         | <0.0001 |
| MHC                                                               | MCHC                                         | 0.543          | <0.0001 |
| MPV                                                               | PDW                                          | 0.586          | <0.0001 |
| PC                                                                | FX                                           | 0.530          | <0.0001 |
| PC                                                                | FVII                                         | 0.553          | <0.0001 |



|       |         |        |         |
|-------|---------|--------|---------|
| PLD   | PDW     | -0.585 | <0.0001 |
| PLD   | MPV     | -0.509 | <0.0001 |
| PT    | FII     | -0.590 | <0.0001 |
| PT    | FVII    | -0.527 | <0.0001 |
| PT%   | PT      | -0.999 | <0.0001 |
| PT%   | FVII    | 0.524  | <0.0001 |
| PT%   | FII     | 0.596  | <0.0001 |
| T-CD3 | B-CD19  | 0.575  | <0.0001 |
| T-CD3 | T-CD8   | 0.830  | <0.0001 |
| T-CD3 | T-CD4   | 0.902  | <0.0001 |
| T-CD4 | T-CD8   | 0.559  | <0.0001 |
| T-CD4 | B-CD19  | 0.607  | <0.0001 |
| T-CD8 | CD4\CD8 | -0.587 | <0.0001 |

| <i>Correlations between radiological metrics</i> |                                    |       |         |
|--------------------------------------------------|------------------------------------|-------|---------|
| FLAIR lesion load                                | number of lesions in FLAIR         | 0.717 | <0.0001 |
| FLAIR lesion load                                | number of lesions in T1            | 0.804 | <0.0001 |
| FLAIR lesion load                                | volume of lesions in T1            | 0.928 | <0.0001 |
| MTT leakage* caudate                             | MTT leakage* Rglobus pallidus      | 0.525 | 0.0001  |
| MTT leakage* caudate                             | MTT leakage* FLAIR                 | 0.582 | <0.0001 |
| MTT leakage* caudate                             | MTT leakage* globus pallidus       | 0.804 | <0.0001 |
| MTT leakage* caudate                             | MTT leakage* Rthalamus             | 0.835 | <0.0001 |
| MTT leakage* caudate                             | MTT leakage* Lthalamus             | 0.837 | <0.0001 |
| MTT leakage* caudate                             | MTT leakage* Lcaudate              | 0.842 | <0.0001 |
| MTT leakage* caudate                             | MTT leakage* Rcaudate              | 0.855 | <0.0001 |
| MTT leakage* caudate                             | MTT leakage* Lputamen              | 0.858 | <0.0001 |
| MTT leakage* caudate                             | MTT leakage* Rputamen              | 0.879 | <0.0001 |
| MTT leakage* caudate                             | MTT leakage* putamen               | 0.917 | <0.0001 |
| MTT leakage* FLAIR                               | rCBV leakage* FLAIR                | 0.502 | 0.0002  |
| MTT leakage* FLAIR                               | MTT leakage* active (Gd+) lesions  | 0.602 | 0.0135  |
| MTT leakage* Lcaudate                            | MTT leakage_re_Lglobus pallidus    | 0.534 | 0.0001  |
| MTT leakage* Lcaudate                            | MTT leakage* active (Gd+) lesions  | 0.576 | 0.0196  |
| MTT leakage* Lcaudate                            | MTT leakage_re_Rglobus pallidus    | 0.587 | <0.0001 |
| MTT leakage* Lcaudate                            | MTT leakage_re_FLAIR               | 0.622 | <0.0001 |
| MTT leakage* active (Gd+) lesions                | rCBV leakage* active (Gd+) lesions | 0.637 | 0.0079  |
| MTT leakage* active (Gd+) lesions                | rCBV leakage* active (Gd+) lesions | 0.637 | 0.0079  |
| MTT leakage* Lglobus pallidus                    | MTT leakage* active (Gd+) lesions  | 0.535 | 0.0329  |
| MTT leakage* Lglobus pallidus                    | MTT leakage* FLAIR                 | 0.622 | <0.0001 |
| MTT leakage* Lputamen                            | MTT leakage* Rglobus pallidus      | 0.529 | 0.0001  |
| MTT leakage* Lputamen                            | MTT leakage* Lcaudate              | 0.714 | <0.0001 |
| MTT leakage* Lputamen                            | MTT leakage* Rcaudate              | 0.750 | <0.0001 |
| MTT leakage* Lputamen                            | MTT leakage* Lthalamus             | 0.878 | <0.0001 |
| MTT leakage* Lputamen                            | MTT leakage* Rthalamus             | 0.889 | <0.0001 |
| MTT leakage* Lthalamus                           | MTT leakage* Lglobus pallidus      | 0.505 | 0.0002  |
| MTT leakage* Lthalamus                           | MTT leakage* Rglobus pallidus      | 0.591 | <0.0001 |
| MTT leakage* Lthalamus                           | MTT leakage* Lcaudate              | 0.736 | <0.0001 |
| MTT leakage* Lthalamus                           | MTT leakage* Rcaudate              | 0.773 | <0.0001 |
| MTT leakage* normal-appearing white matter       | MTT leakage* Lglobus pallidus      | 0.560 | <0.0001 |
| MTT leakage* normal-appearing white matter       | MTT leakage* FLAIR                 | 0.570 | <0.0001 |
| MTT leakage* normal-appearing white matter       | MTT leakage* active (Gd+) lesions  | 0.599 | 0.0142  |
| MTT leakage* normal-appearing white matter       | MTT leakage* Rglobus pallidus      | 0.672 | <0.0001 |
| MTT leakage* normal-appearing white matter       | MTT leakage* Rcaudate              | 0.701 | <0.0001 |
| MTT leakage* normal-appearing white matter       | MTT leakage* Rthalamus             | 0.745 | <0.0001 |
| MTT leakage* normal-appearing white matter       | MTT leakage* Lputamen              | 0.774 | <0.0001 |

|                                            |                                   |       |         |
|--------------------------------------------|-----------------------------------|-------|---------|
| MTT leakage* normal-appearing white matter | MTT leakage* caudate              | 0.800 | <0.0001 |
| MTT leakage* normal-appearing white matter | MTT leakage* Rputamen             | 0.809 | <0.0001 |
| MTT leakage* normal-appearing white matter | MTT leakage* putamen              | 0.823 | <0.0001 |
| MTT leakage* normal-appearing white matter | MTT leakage* Lcaudate             | 0.824 | <0.0001 |
| MTT leakage* normal-appearing white matter | MTT leakage* Lthalamus            | 0.832 | <0.0001 |
| MTT leakage* normal-appearing white matter | MTT leakage* globus pallidus      | 0.855 | <0.0001 |
| MTT leakage* globus pallidus               | MTT leakage* FLAIR                | 0.512 | 0.0001  |
| MTT leakage* globus pallidus               | MTT leakage* active (Gd+) lesions | 0.632 | 0.0087  |
| MTT leakage* globus pallidus               | MTT leakage* Lglobus pallidus     | 0.668 | <0.0001 |
| MTT leakage* globus pallidus               | MTT leakage* Rcaudate             | 0.728 | <0.0001 |
| MTT leakage* globus pallidus               | MTT leakage* Lcaudate             | 0.735 | <0.0001 |
| MTT leakage* globus pallidus               | MTT leakage* Lputamen             | 0.762 | <0.0001 |
| MTT leakage* globus pallidus               | MTT leakage* Rglobus pallidus     | 0.767 | <0.0001 |
| MTT leakage* globus pallidus               | MTT leakage* Rthalamus            | 0.806 | <0.0001 |
| MTT leakage* globus pallidus               | MTT leakage* Lthalamus            | 0.847 | <0.0001 |
| MTT leakage* globus pallidus               | MTT leakage* putamen              | 0.865 | <0.0001 |
| MTT leakage* globus pallidus               | MTT leakage* Rputamen             | 0.881 | <0.0001 |
| MTT leakage* putamen                       | MTT leakage* Lglobus pallidus     | 0.502 | 0.0002  |
| MTT leakage* putamen                       | MTT leakage* FLAIR                | 0.537 | <0.0001 |
| MTT leakage* putamen                       | MTT leakage* active (Gd+) lesions | 0.549 | 0.0275  |
| MTT leakage* putamen                       | MTT leakage* Rglobus pallidus     | 0.627 | <0.0001 |
| MTT leakage* putamen                       | MTT leakage* Rcaudate             | 0.796 | <0.0001 |
| MTT leakage* putamen                       | MTT leakage* Lcaudate             | 0.804 | <0.0001 |
| MTT leakage* putamen                       | MTT leakage* Lthalamus            | 0.924 | <0.0001 |
| MTT leakage* putamen                       | MTT leakage* Rthalamus            | 0.929 | <0.0001 |
| MTT leakage* putamen                       | MTT leakage* Lputamen             | 0.948 | <0.0001 |
| MTT leakage* putamen                       | MTT leakage* Rputamen             | 0.954 | <0.0001 |
| MTT leakage* Rcaudate                      | MTT leakage* Lglobus pallidus     | 0.581 | <0.0001 |
| MTT leakage* Rcaudate                      | MTT leakage* Rglobus pallidus     | 0.583 | <0.0001 |
| MTT leakage* Rcaudate                      | MTT leakage* FLAIR                | 0.645 | <0.0001 |
| MTT leakage* Rcaudate                      | MTT leakage* Lcaudate             | 0.731 | <0.0001 |
| MTT leakage* Rglobus pallidus              | MTT leakage* FLAIR                | 0.505 | 0.0002  |
| MTT leakage* Rglobus pallidus              | MTT leakage* active (Gd+) lesions | 0.605 | 0.0131  |
| MTT leakage* Rglobus pallidus              | MTT leakage* Lglobus pallidus     | 0.837 | <0.0001 |
| MTT leakage* Rputamen                      | MTT leakage* Lglobus pallidus     | 0.534 | 0.0001  |
| MTT leakage* Rputamen                      | MTT leakage* Rglobus pallidus     | 0.658 | <0.0001 |
| MTT leakage* Rputamen                      | MTT leakage* active (Gd+) lesions | 0.658 | 0.0056  |
| MTT leakage* Rputamen                      | MTT leakage* Rcaudate             | 0.732 | <0.0001 |
| MTT leakage* Rputamen                      | MTT leakage* Lcaudate             | 0.793 | <0.0001 |
| MTT leakage* Rputamen                      | MTT leakage* Lputamen             | 0.819 | <0.0001 |
| MTT leakage* Rputamen                      | MTT leakage* Lthalamus            | 0.884 | <0.0001 |
| MTT leakage* Rputamen                      | MTT leakage* Rthalamus            | 0.889 | <0.0001 |
| MTT leakage* Rthalamus                     | MTT leakage* Rglobus pallidus     | 0.600 | <0.0001 |
| MTT leakage* Rthalamus                     | MTT leakage* Lcaudate             | 0.703 | <0.0001 |
| MTT leakage* Rthalamus                     | MTT leakage* Rcaudate             | 0.737 | <0.0001 |
| MTT leakage* Rthalamus                     | MTT leakage* Lthalamus            | 0.920 | <0.0001 |
| number of lesions in FLAIR                 | volume of lesions in T1           | 0.699 | <0.0001 |
| number of lesions in FLAIR                 | number of lesions in T1           | 0.914 | <0.0001 |
| rCBF leakage* caudate                      | rCBV leakage* Lthalamus           | 0.533 | 0.0001  |
| rCBF leakage* caudate                      | rCBV leakage* Rglobus pallidus    | 0.541 | <0.0001 |
| rCBF leakage* caudate                      | rCBV leakage* Lputamen            | 0.551 | <0.0001 |
| rCBF leakage* caudate                      | rCBV leakage* Rthalamus           | 0.553 | <0.0001 |
| rCBF leakage* caudate                      | rCBF leakage* FLAIR               | 0.557 | <0.0001 |
| rCBF leakage* caudate                      | rCBF leakage* Lglobus pallidus    | 0.595 | <0.0001 |

|                                             |                                    |       |         |
|---------------------------------------------|------------------------------------|-------|---------|
| rCBF leakage* caudate                       | rCBV leakage* globus pallidus      | 0.603 | <0.0001 |
| rCBF leakage* caudate                       | rCBV leakage* putamen              | 0.618 | <0.0001 |
| rCBF leakage* caudate                       | rCBV leakage* Rputamen             | 0.631 | <0.0001 |
| rCBF leakage* caudate                       | rCBV leakage* Lcaudate             | 0.693 | <0.0001 |
| rCBF leakage* caudate                       | rCBV leakage* Rcaudate             | 0.714 | <0.0001 |
| rCBF leakage* caudate                       | rCBF leakage* Rglobus pallidus     | 0.723 | <0.0001 |
| rCBF leakage* caudate                       | rCBF leakage* Lthalamus            | 0.738 | <0.0001 |
| rCBF leakage* caudate                       | rCBF leakage* Rthalamus            | 0.771 | <0.0001 |
| rCBF leakage* caudate                       | rCBF leakage* thalamus             | 0.803 | <0.0001 |
| rCBF leakage* caudate                       | rCBF leakage* Rputamen             | 0.815 | <0.0001 |
| rCBF leakage* caudate                       | rCBF leakage* globus pallidus      | 0.858 | <0.0001 |
| rCBF leakage* caudate                       | rCBF leakage* Lputamen             | 0.895 | <0.0001 |
| rCBF leakage* caudate                       | rCBF leakage* putamen              | 0.908 | <0.0001 |
| rCBF leakage* caudate                       | rCBF leakage* Rcaudate             | 0.927 | <0.0001 |
| rCBF leakage* caudate                       | rCBF leakage* Lcaudate             | 0.929 | <0.0001 |
| rCBF leakage* FLAIR                         | rCBF leakage* active (Gd+) lesions | 0.543 | 0.0297  |
| rCBF leakage* FLAIR                         | rCBV leakage* active (Gd+) lesions | 0.597 | 0.0146  |
| rCBF leakage* L caudate                     | rCBV leakage* active (Gd+) lesions | 0.528 | 0.0354  |
| rCBF leakage* L caudate                     | rCBF leakage* FLAIR                | 0.547 | <0.0001 |
| rCBF leakage* L caudate                     | rCBV leakage* Rglobus pallidus     | 0.612 | <0.0001 |
| rCBF leakage* L caudate                     | rCBF leakage* Lglobus pallidus     | 0.639 | <0.0001 |
| rCBF leakage* L caudate                     | rCBF leakage* Rglobus pallidus     | 0.760 | <0.0001 |
| rCBF leakage* Lglobus pallidus              | rCBF leakage* active (Gd+) lesions | 0.611 | 0.0119  |
| rCBF leakage* Lglobus pallidus              | rCBV leakage* FLAIR                | 0.663 | <0.0001 |
| rCBF leakage* Lglobus pallidus              | rCBV leakage* active (Gd+) lesions | 0.670 | 0.0045  |
| rCBF leakage* Lglobus pallidus              | rCBF leakage* FLAIR                | 0.746 | <0.0001 |
| rCBF leakage* Lputamen                      | rCBF leakage* FLAIR                | 0.578 | <0.0001 |
| rCBF leakage* Lputamen                      | rCBV leakage* Lcaudate             | 0.635 | <0.0001 |
| rCBF leakage* Lputamen                      | rCBV leakage* Rcaudate             | 0.643 | <0.0001 |
| rCBF leakage* Lputamen                      | rCBV leakage* Lthalamus            | 0.664 | <0.0001 |
| rCBF leakage* Lputamen                      | rCBF leakage* Lglobus pallidus     | 0.665 | <0.0001 |
| rCBF leakage* Lputamen                      | rCBV leakage* Rthalamus            | 0.669 | <0.0001 |
| rCBF leakage* Lputamen                      | rCBF leakage* Rglobus pallidus     | 0.767 | <0.0001 |
| rCBF leakage* Lputamen                      | rCBF leakage* Lcaudate             | 0.805 | <0.0001 |
| rCBF leakage* Lputamen                      | rCBF leakage* Rcaudate             | 0.845 | <0.0001 |
| rCBF leakage* Lputamen                      | rCBF leakage* Lthalamus            | 0.856 | <0.0001 |
| rCBF leakage* Lputamen                      | rCBF leakage* Rthalamus            | 0.921 | <0.0001 |
| rCBF leakage* Lthalamus                     | rCBF leakage* FLAIR                | 0.559 | <0.0001 |
| rCBF leakage* Lthalamus                     | rCBV leakage* Rcaudate             | 0.580 | <0.0001 |
| rCBF leakage* Lthalamus                     | rCBV leakage* Lcaudate             | 0.583 | <0.0001 |
| rCBF leakage* Lthalamus                     | rCBF leakage* Lglobus pallidus     | 0.690 | <0.0001 |
| rCBF leakage* Lthalamus                     | rCBF leakage* Lcaudate             | 0.746 | <0.0001 |
| rCBF leakage* Lthalamus                     | rCBF leakage* Rglobus pallidus     | 0.747 | <0.0001 |
| rCBF leakage* Lthalamus                     | rCBF leakage* Rcaudate             | 0.796 | <0.0001 |
| rCBF leakage* normal-appearing white matter | rCBV leakage* Lputamen             | 0.507 | 0.0001  |
| rCBF leakage* normal-appearing white matter | rCBF leakage* FLAIR                | 0.527 | 0.0001  |
| rCBF leakage* normal-appearing white matter | rCBV leakage* active (Gd+) lesions | 0.582 | 0.0179  |
| rCBF leakage* normal-appearing white matter | rCBV leakage* putamen              | 0.584 | <0.0001 |
| rCBF leakage* normal-appearing white matter | rCBV leakage* Rputamen             | 0.588 | <0.0001 |
| rCBF leakage* normal-appearing white matter | rCBV leakage* Rcaudate             | 0.593 | <0.0001 |
| rCBF leakage* normal-appearing white matter | rCBV leakage* Lcaudate             | 0.602 | <0.0001 |
| rCBF leakage* normal-appearing white matter | rCBV leakage* globus pallidus      | 0.604 | <0.0001 |
| rCBF leakage* normal-appearing white matter | rCBF leakage* active (Gd+) lesions | 0.623 | 0.01    |
| rCBF leakage* normal-appearing white matter | rCBV leakage* caudate nucleus      | 0.629 | <0.0001 |

|                                             |                                    |       |         |
|---------------------------------------------|------------------------------------|-------|---------|
| rCBF leakage* normal-appearing white matter | rCBV leakage* Lthalamus            | 0.649 | <0.0001 |
| rCBF leakage* normal-appearing white matter | rCBF leakage* Lglobus pallidus     | 0.659 | <0.0001 |
| rCBF leakage* normal-appearing white matter | rCBV leakage* Rthalamus            | 0.673 | <0.0001 |
| rCBF leakage* normal-appearing white matter | rCBF leakage* Rglobus pallidus     | 0.695 | <0.0001 |
| rCBF leakage* normal-appearing white matter | rCBF leakage* Rputamen             | 0.784 | <0.0001 |
| rCBF leakage* normal-appearing white matter | rCBF leakage* Rcaudate             | 0.791 | <0.0001 |
| rCBF leakage* normal-appearing white matter | rCBF leakage* Lcaudate             | 0.812 | <0.0001 |
| rCBF leakage* normal-appearing white matter | rCBF leakage* Lthalamus            | 0.824 | <0.0001 |
| rCBF leakage* normal-appearing white matter | rCBF leakage* caudate              | 0.843 | <0.0001 |
| rCBF leakage* normal-appearing white matter | rCBF leakage* Rthalamus            | 0.875 | <0.0001 |
| rCBF leakage* normal-appearing white matter | rCBF leakage* Lputamen             | 0.884 | <0.0001 |
| rCBF leakage* normal-appearing white matter | rCBF leakage* putamen              | 0.889 | <0.0001 |
| rCBF leakage* normal-appearing white matter | rCBF leakage* globus pallidus      | 0.892 | <0.0001 |
| rCBF leakage* normal-appearing white matter | rCBF leakage* thalamus             | 0.910 | <0.0001 |
| rCBF leakage* globus pallidus               | rCBV leakage* Lglobus pallidus     | 0.531 | 0.0001  |
| rCBF leakage* globus pallidus               | rCBF leakage* active (Gd+) lesions | 0.543 | 0.0297  |
| rCBF leakage* globus pallidus               | rCBV leakage* active (Gd+) lesions | 0.571 | 0.021   |
| rCBF leakage* globus pallidus               | rCBV leakage* Lputamen             | 0.572 | <0.0001 |
| rCBF leakage* globus pallidus               | rCBV leakage* Rglobus pallidus     | 0.574 | <0.0001 |
| rCBF leakage* globus pallidus               | rCBV leakage* Rcaudate             | 0.596 | <0.0001 |
| rCBF leakage* globus pallidus               | rCBF leakage* FLAIR                | 0.643 | <0.0001 |
| rCBF leakage* globus pallidus               | rCBV leakage* Rputamen             | 0.651 | <0.0001 |
| rCBF leakage* globus pallidus               | rCBV leakage* putamen              | 0.652 | <0.0001 |
| rCBF leakage* globus pallidus               | rCBV leakage* Lcaudate             | 0.664 | <0.0001 |
| rCBF leakage* globus pallidus               | rCBV leakage* Rthalamus            | 0.665 | <0.0001 |
| rCBF leakage* globus pallidus               | rCBV leakage* Lthalamus            | 0.673 | <0.0001 |
| rCBF leakage* globus pallidus               | rCBF leakage* Lglobus pallidus     | 0.766 | <0.0001 |
| rCBF leakage* globus pallidus               | rCBF leakage* Rcaudate             | 0.818 | <0.0001 |
| rCBF leakage* globus pallidus               | rCBF leakage* Lcaudate             | 0.824 | <0.0001 |
| rCBF leakage* globus pallidus               | rCBF leakage* Rputamen             | 0.834 | <0.0001 |
| rCBF leakage* globus pallidus               | rCBF leakage* Rglobus pallidus     | 0.834 | <0.0001 |
| rCBF leakage* globus pallidus               | rCBF leakage* Lthalamus            | 0.889 | <0.0001 |
| rCBF leakage* globus pallidus               | rCBF leakage* Rthalamus            | 0.918 | <0.0001 |
| rCBF leakage* globus pallidus               | rCBF leakage* Lputamen             | 0.921 | <0.0001 |
| rCBF leakage* globus pallidus               | rCBF leakage* putamen              | 0.932 | <0.0001 |
| rCBF leakage* putamen                       | rCBV leakage* active (Gd+) lesions | 0.511 | 0.0432  |
| rCBF leakage* putamen                       | rCBV leakage* Rglobus pallidus     | 0.515 | 0.0001  |
| rCBF leakage* putamen                       | rCBF leakage* FLAIR                | 0.597 | <0.0001 |
| rCBF leakage* putamen                       | rCBV leakage* Lputamen             | 0.620 | <0.0001 |
| rCBF leakage* putamen                       | rCBV leakage* Lcaudate             | 0.655 | <0.0001 |
| rCBF leakage* putamen                       | rCBV leakage* Rcaudate             | 0.661 | <0.0001 |
| rCBF leakage* putamen                       | rCBF leakage* Lglobus pallidus     | 0.674 | <0.0001 |
| rCBF leakage* putamen                       | rCBV leakage* Lthalamus            | 0.675 | <0.0001 |
| rCBF leakage* putamen                       | rCBV leakage* Rthalamus            | 0.677 | <0.0001 |
| rCBF leakage* putamen                       | rCBV leakage* Rputamen             | 0.687 | <0.0001 |
| rCBF leakage* putamen                       | rCBF leakage* Rglobus pallidus     | 0.782 | <0.0001 |
| rCBF leakage* putamen                       | rCBF leakage* Lcaudate             | 0.821 | <0.0001 |
| rCBF leakage* putamen                       | rCBF leakage* Lthalamus            | 0.870 | <0.0001 |
| rCBF leakage* putamen                       | rCBF leakage* Rcaudate             | 0.871 | <0.0001 |
| rCBF leakage* putamen                       | rCBF leakage* Rputamen             | 0.897 | <0.0001 |
| rCBF leakage* putamen                       | rCBF leakage* Rthalamus            | 0.930 | <0.0001 |
| rCBF leakage* putamen                       | rCBF leakage* Lputamen             | 0.992 | <0.0001 |
| rCBF leakage* Rcaudate                      | rCBF leakage* FLAIR                | 0.548 | <0.0001 |
| rCBF leakage* Rcaudate                      | rCBV leakage* active (Gd+) lesions | 0.558 | 0.0248  |

|                                |                                    |       |         |
|--------------------------------|------------------------------------|-------|---------|
| rCBF leakage* Rcaudate         | rCBF leakage* Lglobus pallidus     | 0.587 | <0.0001 |
| rCBF leakage* Rcaudate         | rCBV leakage* Lcaudate nucleus     | 0.659 | <0.0001 |
| rCBF leakage* Rcaudate         | rCBF leakage* Rglobus pallidus     | 0.724 | <0.0001 |
| rCBF leakage* Rcaudate         | rCBF leakage* Lcaudate             | 0.891 | <0.0001 |
| rCBF leakage* Rglobus pallidus | rCBF leakage* FLAIR                | 0.549 | <0.0001 |
| rCBF leakage* Rglobus pallidus | rCBF leakage* Lglobus pallidus     | 0.793 | <0.0001 |
| rCBF leakage* Rputamen         | rCBF leakage* FLAIR                | 0.521 | 0.0001  |
| rCBF leakage* Rputamen         | rCBV leakage* Rcaudate             | 0.551 | <0.0001 |
| rCBF leakage* Rputamen         | rCBV leakage* Lcaudate             | 0.554 | <0.0001 |
| rCBF leakage* Rputamen         | rCBV leakage* Lthalamus            | 0.559 | <0.0001 |
| rCBF leakage* Rputamen         | rCBV leakage* Rthalamus            | 0.562 | <0.0001 |
| rCBF leakage* Rputamen         | rCBF leakage* Lglobus pallidus     | 0.583 | <0.0001 |
| rCBF leakage* Rputamen         | rCBF leakage* Rglobus pallidus     | 0.682 | <0.0001 |
| rCBF leakage* Rputamen         | rCBV leakage* Lputamen             | 0.714 | <0.0001 |
| rCBF leakage* Rputamen         | rCBF leakage* Lcaudate             | 0.717 | <0.0001 |
| rCBF leakage* Rputamen         | rCBF leakage* Lthalamus            | 0.755 | <0.0001 |
| rCBF leakage* Rputamen         | rCBF leakage* Rcaudate             | 0.766 | <0.0001 |
| rCBF leakage* Rputamen         | rCBF leakage* Rthalamus            | 0.827 | <0.0001 |
| rCBF leakage* Rputamen         | rCBF leakage* Lputamen             | 0.981 | <0.0001 |
| rCBF_leakage* Rthalamus        | rCBV leakage* Lglobus pallidus     | 0.512 | 0.0001  |
| rCBF_leakage* Rthalamus        | rCBV leakage* Rcaudate             | 0.570 | <0.0001 |
| rCBF_leakage* Rthalamus        | rCBV leakage* Lcaudate nucleus     | 0.583 | <0.0001 |
| rCBF_leakage* Rthalamus        | rCBF leakage* FLAIR                | 0.606 | <0.0001 |
| rCBF_leakage* Rthalamus        | rCBF leakage* Lcaudate             | 0.682 | <0.0001 |
| rCBF_leakage* Rthalamus        | rCBF leakage* Lglobus pallidus     | 0.713 | <0.0001 |
| rCBF_leakage* Rthalamus        | rCBV leakage* Lthalamus            | 0.722 | <0.0001 |
| rCBF_leakage* Rthalamus        | rCBF leakage* Rglobus pallidus     | 0.741 | <0.0001 |
| rCBF_leakage* Rthalamus        | rCBF leakage* Rcaudate             | 0.750 | <0.0001 |
| rCBF_leakage* Rthalamus        | rCBF leakage* Lthalamus            | 0.885 | <0.0001 |
| rCBF leakage* thalamus         | rCBV leakage* Rglobus pallidus     | 0.515 | 0.0001  |
| rCBF leakage* thalamus         | rCBV leakage* Lglobus pallidus     | 0.519 | 0.0001  |
| rCBF leakage* thalamus         | rCBV leakage* Lputamen             | 0.580 | <0.0001 |
| rCBF leakage* thalamus         | rCBV leakage* Rcaudate nucleus     | 0.598 | <0.0001 |
| rCBF leakage* thalamus         | rCBF leakage* FLAIR                | 0.605 | <0.0001 |
| rCBF leakage* thalamus         | rCBV leakage* Lcaudate             | 0.619 | <0.0001 |
| rCBF leakage* thalamus         | rCBV leakage* putamen              | 0.649 | <0.0001 |
| rCBF leakage* thalamus         | rCBV leakage* Rputamen             | 0.659 | <0.0001 |
| rCBF leakage* thalamus         | rCBV leakage* globus pallidus      | 0.677 | <0.0001 |
| rCBF leakage* thalamus         | rCBF leakage* Lglobus pallidus     | 0.720 | <0.0001 |
| rCBF leakage* thalamus         | rCBF leakage* Lcaudate             | 0.727 | <0.0001 |
| rCBF leakage* thalamus         | rCBV leakage* Lthalamus            | 0.741 | <0.0001 |
| rCBF leakage* thalamus         | rCBV leakage* Rthalamus            | 0.750 | <0.0001 |
| rCBF leakage* thalamus         | rCBF leakage* Rglobus pallidus     | 0.760 | <0.0001 |
| rCBF leakage* thalamus         | rCBF leakage* Rcaudate             | 0.766 | <0.0001 |
| rCBF leakage* thalamus         | rCBF leakage* Rputamen             | 0.832 | <0.0001 |
| rCBF leakage* thalamus         | rCBF leakage* Lthalamus            | 0.906 | <0.0001 |
| rCBF leakage* thalamus         | rCBF leakage* globus pallidus      | 0.933 | <0.0001 |
| rCBF leakage* thalamus         | rCBF leakage* Lputamen             | 0.939 | <0.0001 |
| rCBF leakage* thalamus         | rCBF leakage* putamen              | 0.941 | <0.0001 |
| rCBF leakage* thalamus         | rCBF leakage* Rthalamus            | 0.989 | <0.0001 |
| rCBV leakage* caudate          | rCBV leakage* Lglobus pallidus     | 0.529 | 0.0001  |
| rCBV leakage* caudate          | rCBV leakage* active (Gd+) lesions | 0.562 | 0.0235  |
| rCBV leakage* caudate          | rCBF leakage* Lthalamus            | 0.586 | <0.0001 |
| rCBV leakage* caudate          | rCBF leakage* Rputamen             | 0.596 | <0.0001 |

|                                    |                                    |       |         |
|------------------------------------|------------------------------------|-------|---------|
| rCBV leakage* caudate              | rCBF leakage* Rthalamus            | 0.612 | <0.0001 |
| rCBV leakage* caudate              | rCBF leakage* Rglobus pallidus     | 0.613 | <0.0001 |
| rCBV leakage* caudate              | rCBV leakage* FLAIR                | 0.630 | <0.0001 |
| rCBV leakage* caudate              | rCBF leakage* FLAIR                | 0.641 | <0.0001 |
| rCBV leakage* caudate              | rCBF leakage* thalamus             | 0.645 | <0.0001 |
| rCBV leakage* caudate              | rCBF leakage* globus pallidus      | 0.659 | <0.0001 |
| rCBV leakage* caudate              | rCBF leakage* Lputamen             | 0.681 | <0.0001 |
| rCBV leakage* caudate              | rCBF leakage* putamen              | 0.698 | <0.0001 |
| rCBV leakage* caudate              | rCBF leakage* Rcaudate             | 0.723 | <0.0001 |
| rCBV leakage* caudate              | rCBV leakage* Rglobus pallidus     | 0.723 | <0.0001 |
| rCBV leakage* caudate              | rCBF leakage* caudate              | 0.751 | <0.0001 |
| rCBV leakage* caudate              | rCBF leakage* Lcaudate             | 0.762 | <0.0001 |
| rCBV leakage* caudate              | rCBV leakage* Lputamen             | 0.787 | <0.0001 |
| rCBV leakage* caudate              | rCBV leakage* Lthalamus            | 0.800 | <0.0001 |
| rCBV leakage* caudate              | rCBV leakage* Rthalamus            | 0.825 | <0.0001 |
| rCBV leakage* caudate              | rCBV leakage* globus pallidus      | 0.850 | <0.0001 |
| rCBV leakage* caudate              | rCBV leakage* putamen              | 0.884 | <0.0001 |
| rCBV leakage* caudate              | rCBV leakage* Rputamen             | 0.902 | <0.0001 |
| rCBV leakage* caudate              | rCBV leakage* Rcaudate             | 0.950 | <0.0001 |
| rCBV leakage* caudate              | rCBV leakage* Lcaudate             | 0.956 | <0.0001 |
| rCBV leakage* FLAIR                | rCBF leakage* active (Gd+) lesions | 0.584 | 0.0175  |
| rCBV leakage* FLAIR                | rCBV leakage* active (Gd+) lesions | 0.665 | 0.005   |
| rCBV leakage* FLAIR                | rCBF leakage* FLAIR                | 0.936 | <0.0001 |
| rCBV leakage* Lcaudate             | rCBF leakage* Lglobus pallidus     | 0.540 | <0.0001 |
| rCBV leakage* Lcaudate             | rCBV leakage* Lglobus pallidus     | 0.584 | <0.0001 |
| rCBV leakage* Lcaudate             | rCBF leakage* Rglobus pallidus     | 0.600 | <0.0001 |
| rCBV leakage* Lcaudate             | rCBV leakage* FLAIR                | 0.640 | <0.0001 |
| rCBV leakage* Lcaudate             | MTT leakage* active (Gd+) lesions  | 0.652 | 0.0062  |
| rCBV leakage* Lcaudate             | rCBV leakage* active (Gd+) lesions | 0.658 | 0.0056  |
| rCBV leakage* Lcaudate             | rCBF leakage* FLAIR                | 0.658 | <0.0001 |
| rCBV leakage* Lcaudate             | rCBV leakage* Rglobus pallidus     | 0.736 | <0.0001 |
| rCBV leakage* Lcaudate             | rCBF leakage* Lcaudate             | 0.763 | <0.0001 |
| rCBV leakage* active (Gd+) lesions | rCBF leakage* active (Gd+) lesions | 0.840 | <0.0001 |
| rCBV leakage* active (Gd+) lesions | rCBF leakage* active (Gd+) lesions | 0.840 | <0.0001 |
| rCBV leakage* Lglobus pallidus     | MTT leakage* active (Gd+) lesions  | 0.579 | 0.0188  |
| rCBV leakage* Lglobus pallidus     | rCBF leakage* FLAIR                | 0.612 | <0.0001 |
| rCBV leakage* Lglobus pallidus     | rCBV leakage* FLAIR                | 0.672 | <0.0001 |
| rCBV leakage* Lglobus pallidus     | rCBV leakage* active (Gd+) lesions | 0.675 | 0.0041  |
| rCBV leakage* Lglobus pallidus     | rCBF leakage* Lglobus pallidus     | 0.699 | <0.0001 |
| rCBV leakage* Lputamen             | rCBV leakage* FLAIR                | 0.508 | 0.0001  |
| rCBV leakage* Lputamen             | rCBF leakage* Lthalamus            | 0.515 | 0.0001  |
| rCBV leakage* Lputamen             | rCBF leakage* Rglobus pallidus     | 0.516 | 0.0001  |
| rCBV leakage* Lputamen             | rCBF leakage* FLAIR                | 0.523 | 0.0001  |
| rCBV leakage* Lputamen             | rCBF leakage* Rcaudate             | 0.535 | 0.0001  |
| rCBV leakage* Lputamen             | rCBF leakage* Lcaudate nucleus     | 0.550 | <0.0001 |
| rCBV leakage* Lputamen             | rCBF leakage* Rthalamus            | 0.566 | <0.0001 |
| rCBV leakage* Lputamen             | rCBV leakage* Rglobus pallidus     | 0.624 | <0.0001 |
| rCBV leakage* Lputamen             | rCBF leakage* Lputamen             | 0.714 | <0.0001 |
| rCBV leakage* Lputamen             | rCBV leakage* Rcaudate             | 0.745 | <0.0001 |
| rCBV leakage* Lputamen             | rCBV leakage* Lthalamus            | 0.780 | <0.0001 |
| rCBV leakage* Lputamen             | rCBV leakage* Lcaudate             | 0.781 | <0.0001 |
| rCBV leakage* Lputamen             | rCBV leakage* Rthalamus            | 0.782 | <0.0001 |
| rCBV leakage* Lthalamus            | rCBF leakage* Lglobus pallidus     | 0.536 | 0.0001  |
| rCBV leakage* Lthalamus            | rCBF leakage* Rglobus pallidus     | 0.547 | <0.0001 |

|                                             |                                             |       |         |
|---------------------------------------------|---------------------------------------------|-------|---------|
| rCBV leakage* Lthalamus                     | rCBF leakage* Lcaudate                      | 0.549 | <0.0001 |
| rCBV leakage* Lthalamus                     | MTT leakage* active (Gd+) lesions           | 0.567 | 0.0221  |
| rCBV leakage* Lthalamus                     | rCBV leakage* Lglobus pallidus              | 0.574 | <0.0001 |
| rCBV leakage* Lthalamus                     | rCBF leakage* Rcaudate nucleus              | 0.582 | <0.0001 |
| rCBV leakage* Lthalamus                     | rCBV leakage* FLAIR                         | 0.585 | <0.0001 |
| rCBV leakage* Lthalamus                     | rCBF leakage* FLAIR                         | 0.605 | <0.0001 |
| rCBV leakage* Lthalamus                     | rCBF leakage* active (Gd+) lesions          | 0.614 | 0.0115  |
| rCBV leakage* Lthalamus                     | rCBV leakage* Rglobus pallidus              | 0.632 | <0.0001 |
| rCBV leakage* Lthalamus                     | rCBF leakage* Lthalamus                     | 0.721 | <0.0001 |
| rCBV leakage* Lthalamus                     | rCBV leakage* active (Gd+) lesions          | 0.750 | 0.0008  |
| rCBV leakage* Lthalamus                     | rCBV leakage* Rcaudate                      | 0.787 | <0.0001 |
| rCBV leakage* Lthalamus                     | rCBV leakage* Lcaudate nucleus              | 0.800 | <0.0001 |
| rCBV leakage* normal-appearing white matter | rCBF leakage* Rglobus pallidus              | 0.526 | 0.0001  |
| rCBV leakage* normal-appearing white matter | rCBV leakage* FLAIR                         | 0.539 | <0.0001 |
| rCBV leakage* normal-appearing white matter | rCBF leakage* FLAIR                         | 0.540 | <0.0001 |
| rCBV leakage* normal-appearing white matter | rCBV leakage* Lglobus pallidus              | 0.562 | <0.0001 |
| rCBV leakage* normal-appearing white matter | rCBF leakage* Rputamen                      | 0.571 | <0.0001 |
| rCBV leakage* normal-appearing white matter | rCBF leakage* Rcaudate                      | 0.595 | <0.0001 |
| rCBV leakage* normal-appearing white matter | rCBF leakage* caudate                       | 0.614 | <0.0001 |
| rCBV leakage* normal-appearing white matter | rCBF leakage* Lthalamus                     | 0.623 | <0.0001 |
| rCBV leakage* normal-appearing white matter | rCBV leakage* active (Gd+) lesions          | 0.624 | 0.0099  |
| rCBV leakage* normal-appearing white matter | rCBF leakage* Lcaudate                      | 0.635 | <0.0001 |
| rCBV leakage* normal-appearing white matter | rCBV leakage* Rglobus pallidus              | 0.645 | <0.0001 |
| rCBV leakage* normal-appearing white matter | rCBF leakage* Lputamen                      | 0.658 | <0.0001 |
| rCBV leakage* normal-appearing white matter | rCBF leakage* globus pallidus               | 0.659 | <0.0001 |
| rCBV leakage* normal-appearing white matter | rCBF leakage* putamen                       | 0.671 | <0.0001 |
| rCBV leakage* normal-appearing white matter | rCBF leakage* Rthalamus                     | 0.685 | <0.0001 |
| rCBV leakage* normal-appearing white matter | rCBF leakage* thalamus                      | 0.719 | <0.0001 |
| rCBV leakage* normal-appearing white matter | rCBV leakage* Lputamen                      | 0.736 | <0.0001 |
| rCBV leakage* normal-appearing white matter | rCBF leakage* normal-appearing white matter | 0.770 | <0.0001 |
| rCBV leakage* normal-appearing white matter | rCBV leakage* Lcaudate                      | 0.821 | <0.0001 |
| rCBV leakage* normal-appearing white matter | rCBV leakage* Rcaudate                      | 0.823 | <0.0001 |
| rCBV leakage* normal-appearing white matter | rCBV leakage* globus pallidus               | 0.827 | <0.0001 |
| rCBV leakage* normal-appearing white matter | rCBV leakage* putamen                       | 0.830 | <0.0001 |
| rCBV leakage* normal-appearing white matter | rCBV leakage* caudate                       | 0.846 | <0.0001 |
| rCBV leakage* normal-appearing white matter | rCBV leakage* Rputamen                      | 0.848 | <0.0001 |
| rCBV leakage* normal-appearing white matter | rCBV leakage* Lthalamus                     | 0.879 | <0.0001 |
| rCBV leakage* normal-appearing white matter | rCBV leakage* Rthalamus                     | 0.906 | <0.0001 |
| rCBV leakage* globus pallidus               | rCBF leakage* Rcaudate                      | 0.561 | <0.0001 |
| rCBV leakage* globus pallidus               | rCBF leakage* Lglobus pallidus              | 0.569 | <0.0001 |
| rCBV leakage* globus pallidus               | rCBF leakage* Rputamen                      | 0.570 | <0.0001 |
| rCBV leakage* globus pallidus               | rCBF leakage* Lthalamus                     | 0.596 | <0.0001 |
| rCBV leakage* globus pallidus               | rCBV leakage* FLAIR                         | 0.611 | <0.0001 |
| rCBV leakage* globus pallidus               | rCBF leakage* Lcaudate                      | 0.621 | <0.0001 |
| rCBV leakage* globus pallidus               | rCBF leakage* Rglobus pallidus              | 0.621 | <0.0001 |
| rCBV leakage* globus pallidus               | rCBF leakage* FLAIR                         | 0.626 | <0.0001 |
| rCBV leakage* globus pallidus               | MTT leakage* active (Gd+) lesions           | 0.628 | 0.0091  |
| rCBV leakage* globus pallidus               | rCBF leakage* Lputamen                      | 0.637 | <0.0001 |
| rCBV leakage* globus pallidus               | rCBV leakage* active (Gd+) lesions          | 0.650 | 0.0064  |
| rCBV leakage* globus pallidus               | rCBF leakage* Rthalamus                     | 0.656 | <0.0001 |
| rCBV leakage* globus pallidus               | rCBF leakage* putamen                       | 0.661 | <0.0001 |
| rCBV leakage* globus pallidus               | rCBV leakage* Lglobus pallidus              | 0.681 | <0.0001 |
| rCBV leakage* globus pallidus               | rCBF leakage* globus pallidus               | 0.715 | <0.0001 |
| rCBV leakage* globus pallidus               | rCBV leakage* Rcaudate                      | 0.754 | <0.0001 |

|                                |                                    |       |         |
|--------------------------------|------------------------------------|-------|---------|
| rCBV leakage* globus pallidus  | rCBV leakage* Lputamen             | 0.782 | <0.0001 |
| rCBV leakage* globus pallidus  | rCBV leakage* Rglobus pallidus     | 0.805 | <0.0001 |
| rCBV leakage* globus pallidus  | rCBV leakage* Rthalamus            | 0.845 | <0.0001 |
| rCBV leakage* globus pallidus  | rCBV leakage* Lthalamus            | 0.855 | <0.0001 |
| rCBV leakage* globus pallidus  | rCBV leakage* putamen              | 0.871 | <0.0001 |
| rCBV leakage* globus pallidus  | rCBV leakage* Lcaudate             | 0.876 | <0.0001 |
| rCBV leakage* globus pallidus  | rCBV leakage* Rputamen             | 0.908 | <0.0001 |
| rCBV leakage* putamen          | rCBV leakage* Lglobus pallidus     | 0.523 | 0.0001  |
| rCBV leakage* putamen          | rCBV leakage* FLAIR                | 0.558 | <0.0001 |
| rCBV leakage* putamen          | rCBF leakage* Rglobus pallidus     | 0.579 | <0.0001 |
| rCBV leakage* putamen          | rCBF leakage* Rputamen             | 0.582 | <0.0001 |
| rCBV leakage* putamen          | MTT leakage* active (Gd+) lesions  | 0.582 | 0.0181  |
| rCBV leakage* putamen          | rCBF leakage* FLAIR                | 0.598 | <0.0001 |
| rCBV leakage* putamen          | rCBF leakage* Rthalamus            | 0.640 | <0.0001 |
| rCBV leakage* putamen          | rCBF leakage* Lcaudate             | 0.660 | <0.0001 |
| rCBV leakage* putamen          | rCBF leakage* Lthalamus            | 0.660 | <0.0001 |
| rCBV leakage* putamen          | rCBF leakage_re_Rcaudate           | 0.663 | <0.0001 |
| rCBV leakage* putamen          | rCBF leakage_re_Lputamen           | 0.673 | <0.0001 |
| rCBV leakage* putamen          | rCBV leakage* active (Gd+) lesions | 0.687 | 0.0033  |
| rCBV leakage* putamen          | rCBF leakage* putamen              | 0.690 | <0.0001 |
| rCBV leakage* putamen          | rCBV leakage* Rglobus pallidus     | 0.711 | <0.0001 |
| rCBV leakage* putamen          | rCBV leakage* Rcaudate             | 0.853 | <0.0001 |
| rCBV leakage* putamen          | rCBV leakage* Lputamen             | 0.860 | <0.0001 |
| rCBV leakage* putamen          | rCBV leakage* Rthalamus            | 0.876 | <0.0001 |
| rCBV leakage* putamen          | rCBV leakage* Lcaudate             | 0.897 | <0.0001 |
| rCBV leakage* putamen          | rCBV leakage* Lthalamus            | 0.898 | <0.0001 |
| rCBV leakage* putamen          | rCBV leakage* Rputamen             | 0.963 | <0.0001 |
| rCBV leakage* Rcaudate         | MTT leakage* active (Gd+) lesions  | 0.538 | 0.0318  |
| rCBV leakage* Rcaudate         | rCBF leakage* Rglobus pallidus     | 0.553 | <0.0001 |
| rCBV leakage* Rcaudate         | rCBV leakage* FLAIR                | 0.569 | <0.0001 |
| rCBV leakage* Rcaudate         | rCBF leakage* FLAIR                | 0.571 | <0.0001 |
| rCBV leakage* Rcaudate         | rCBV leakage* Rglobus pallidus     | 0.653 | <0.0001 |
| rCBV leakage* Rcaudate         | rCBV leakage* active (Gd+) lesions | 0.655 | 0.0059  |
| rCBV leakage* Rcaudate         | rCBF leakage* Lcaudate             | 0.709 | <0.0001 |
| rCBV leakage* Rcaudate         | rCBF leakage* Rcaudate             | 0.739 | <0.0001 |
| rCBV leakage* Rcaudate         | rCBV leakage* Lcaudate             | 0.863 | <0.0001 |
| rCBV leakage* Rglobus pallidus | MTT leakage* active (Gd+) lesions  | 0.582 | 0.0181  |
| rCBV leakage* Rglobus pallidus | rCBV leakage* active (Gd+) lesions | 0.596 | 0.0148  |
| rCBV leakage* Rglobus pallidus | rCBF leakage* Rglobus pallidus     | 0.670 | <0.0001 |
| rCBV leakage* Rglobus pallidus | rCBV leakage* Lglobus pallidus     | 0.686 | <0.0001 |
| rCBV leakage* Rputamen         | MTT leakage* Lcaudate              | 0.501 | 0.0002  |
| rCBV leakage* Rputamen         | rCBV leakage* Lglobus pallidus     | 0.558 | <0.0001 |
| rCBV leakage* Rputamen         | rCBF leakage* Rglobus pallidus     | 0.561 | <0.0001 |
| rCBV leakage* Rputamen         | rCBF leakage* Rputamen             | 0.588 | <0.0001 |
| rCBV leakage* Rputamen         | rCBF leakage* Lthalamus            | 0.595 | <0.0001 |
| rCBV leakage* Rputamen         | rCBV leakage* FLAIR                | 0.604 | <0.0001 |
| rCBV leakage* Rputamen         | rCBF leakage* FLAIR                | 0.621 | <0.0001 |
| rCBV leakage* Rputamen         | rCBF leakage* Rcaudate             | 0.626 | <0.0001 |
| rCBV leakage* Rputamen         | rCBF leakage* Lcaudate             | 0.640 | <0.0001 |
| rCBV leakage* Rputamen         | rCBF leakage* Rthalamus            | 0.650 | <0.0001 |
| rCBV leakage* Rputamen         | rCBF leakage* Lputamen             | 0.669 | <0.0001 |
| rCBV leakage* Rputamen         | MTT leakage* active (Gd+) lesions  | 0.693 | 0.0029  |
| rCBV leakage* Rputamen         | rCBV leakage* active (Gd+) lesions | 0.712 | 0.002   |
| rCBV leakage* Rputamen         | rCBV leakage* Rglobus pallidus     | 0.729 | <0.0001 |



|                                                                                                    |                                    |        |         |
|----------------------------------------------------------------------------------------------------|------------------------------------|--------|---------|
| rCBV leakage* Rputamen                                                                             | rCBV leakage* Lputamen             | 0.836  | <0.0001 |
| rCBV leakage* Rputamen                                                                             | rCBV leakage* Rcaudate             | 0.843  | <0.0001 |
| rCBV leakage* Rputamen                                                                             | rCBV leakage* Rthalamus            | 0.875  | <0.0001 |
| rCBV leakage* Rputamen                                                                             | rCBV leakage* Lthalamus            | 0.877  | <0.0001 |
| rCBV leakage* Rputamen                                                                             | rCBV leakage* Lcaudate             | 0.912  | <0.0001 |
| rCBV leakage* Rthalamus                                                                            | rCBF leakage* Lglobus pallidus     | 0.506  | 0.0002  |
| rCBV leakage* Rthalamus                                                                            | rCBF leakage* Rglobus pallidus     | 0.547  | <0.0001 |
| rCBV leakage* Rthalamus                                                                            | rCBV leakage* FLAIR                | 0.554  | <0.0001 |
| rCBV leakage* Rthalamus                                                                            | rCBF leakage* Rcaudate             | 0.556  | <0.0001 |
| rCBV leakage* Rthalamus                                                                            | rCBF leakage* Lcaudate             | 0.557  | <0.0001 |
| rCBV leakage* Rthalamus                                                                            | rCBF leakage* FLAIR                | 0.571  | <0.0001 |
| rCBV leakage* Rthalamus                                                                            | rCBF leakage* active (Gd+) lesions | 0.579  | 0.0188  |
| rCBV leakage* Rthalamus                                                                            | rCBV leakage* Lglobus pallidus     | 0.598  | <0.0001 |
| rCBV leakage* Rthalamus                                                                            | rCBV leakage* active (Gd+) lesions | 0.649  | 0.0065  |
| rCBV leakage* Rthalamus                                                                            | rCBF leakage* Lthalamus            | 0.650  | <0.0001 |
| rCBV leakage* Rthalamus                                                                            | rCBV leakage* Rglobus pallidus     | 0.666  | <0.0001 |
| rCBV leakage* Rthalamus                                                                            | rCBF leakage* Rthalamus            | 0.737  | <0.0001 |
| rCBV leakage* Rthalamus                                                                            | rCBV leakage* Rcaudate             | 0.772  | <0.0001 |
| rCBV leakage* Rthalamus                                                                            | rCBV leakage* Lcaudate             | 0.814  | <0.0001 |
| rCBV leakage* Rthalamus                                                                            | rCBV leakage* Lthalamus            | 0.937  | <0.0001 |
| volume of active (Gd+) lesions                                                                     | number of active (Gd+) lesions     | 0.989  | <0.0001 |
| volume of lesions in T1                                                                            | number of lesions in T1            | 0.840  | <0.0001 |
| <b><i>Correlations between demographics/clinical characteristics and laboratory biomarkers</i></b> |                                    |        |         |
| BMI                                                                                                | C3                                 | 0.592  | <0.0001 |
| Number of relapses in the previous 24 months                                                       | Vitamin A                          | 0.512  | 0.0004  |
| number of relapses in the previous 12 months                                                       | Vitamin A                          | 0.540  | 0.0002  |
| <b><i>Correlations between demographics/clinical characteristics and radiological metrics</i></b>  |                                    |        |         |
| Age                                                                                                | rCBF leakage* active (Gd+) lesions | 0.634  | 0.0084  |
| Age                                                                                                | rCBV leakage* active (Gd+) lesions | 0.704  | 0.0023  |
| Z_SCORE_T25_Fw                                                                                     | rCBF leakage* active (Gd+) lesions | -0.623 | 0.0131  |
| Disease duration                                                                                   | rCBV leakage* active (Gd+) lesions | 0.619  | 0.0105  |
| Disease duration                                                                                   | rCBF leakage* active (Gd+) lesions | 0.761  | 0.0006  |
| Number of relapses in the previous 24 months                                                       | rCBF leakage* active (Gd+) lesions | -0.549 | 0.0275  |
| Number of relapses in the previous 12 months                                                       | rCBF leakage* active (Gd+) lesions | -0.734 | 0.0012  |
| Number of relapses in the previous 12 months                                                       | rCBV leakage* active (Gd+) lesions | -0.559 | 0.0244  |
| Z_SCORE_9-HPT                                                                                      | rCBV leakage* active (Gd+) lesions | -0.609 | 0.0159  |
| <b><i>Correlations between laboratory biomarkers and radiological metrics</i></b>                  |                                    |        |         |
| Chlamydia_IgA                                                                                      | rCBF leakage* active (Gd+) lesions | -0.587 | 0.0169  |
| Cytomegalovirus_IgG                                                                                | rCBV leakage* active (Gd+) lesions | 0.522  | 0.0381  |
| Cytomegalovirus_IgG                                                                                | rCBF leakage* active (Gd+) lesions | 0.598  | 0.0145  |
| Cytomegalovirus_IgM                                                                                | rCBV leakage* active (Gd+) lesions | 0.595  | 0.0151  |
| Cytomegalovirus_IgM                                                                                | MTT leakage* active (Gd+) lesions  | 0.828  | 0.0001  |
| Epstein-Barr_IgM                                                                                   | MTT leakage* active (Gd+) lesions  | 0.502  | 0.0476  |
| RBC                                                                                                | rCBV leakage* active (Gd+) lesions | -0.515 | 0.0413  |
| Anti-prothrombin_IgM                                                                               | MTT leakage* active (Gd+) lesions  | 0.524  | 0.045   |
| FII                                                                                                | rCBV leakage* active (Gd+) lesions | 0.537  | 0.032   |
| HerpesSimplexType1_IgM                                                                             | rCBV leakage* active (Gd+) lesions | 0.511  | 0.0432  |
| aC4                                                                                                | rCBF leakage* active (Gd+) lesions | -0.610 | 0.0157  |
| Tissue_Factor                                                                                      | MTT leakage* active (Gd+) lesions  | -0.746 | 0.0009  |
| P-Selectin\CD62P                                                                                   | MTT leakage* active (Gd+) lesions  | -0.645 | 0.007   |
| P-Selectin\CD62P                                                                                   | rCBV leakage* active (Gd+) lesions | -0.529 | 0.035   |
| InfluenzaB_IgA                                                                                     | MTT leakage* active (Gd+) lesions  | 0.532  | 0.034   |

|                |                                    |        |        |
|----------------|------------------------------------|--------|--------|
| InfluenzaB_IgA | rCBF leakage* active (Gd+) lesions | 0.607  | 0.0127 |
| InfluenzaB_IgA | rCBV leakage* active (Gd+) lesions | 0.777  | 0.0004 |
| MHC            | rCBV leakage* active (Gd+) lesions | 0.535  | 0.0329 |
| Mycoplasma_IgA | MTT leakage* active (Gd+) lesions  | -0.511 | 0.0429 |
| Mycoplasma_IgG | MTT leakage* active (Gd+) lesions  | -0.524 | 0.0372 |
| PC             | rCBF leakage* active (Gd+) lesions | 0.510  | 0.0434 |
| PC             | MTT leakage* active (Gd+) lesions  | 0.518  | 0.04   |
| PC             | rCBV leakage* active (Gd+) lesions | 0.665  | 0.0049 |
| PT             | MTT leakage* active (Gd+) lesions  | -0.543 | 0.0299 |
| PT             | rCBV leakage* active (Gd+) lesions | -0.533 | 0.0334 |
| PT%            | rCBV leakage* active (Gd+) lesions | 0.529  | 0.0352 |
| PT%            | MTT leakage* active (Gd+) lesions  | 0.548  | 0.0278 |
| T-CD8          | rCBF leakage* active (Gd+) lesions | 0.549  | 0.0342 |
| Vitamin D      | FLAIR lesion load(ml)              | -0.513 | 0.0063 |
| Vitamin D      | Volume lesions in T1(ml)           | -0.504 | 0.0074 |
| Vitamin K      | rCBV leakage* active (Gd+) lesions | -0.827 | 0.0017 |
| Vitamin K      | rCBF leakage* active (Gd+) lesions | -0.720 | 0.0125 |
| Vitamin K      | MTT leakage* active (Gd+) lesions  | -0.692 | 0.0182 |
| vWF            | rCBV leakage* active (Gd+) lesions | 0.521  | 0.0462 |

\* A leakage correction analysis was also performed, in order to correct for contrast agent extravasation.

For the abbreviations and units of all laboratory and MRI parameters, see Supplementary Table 1 and Supplementary Table 2.

BMI=body mass index; EDSS=Expanded Disability Status Scale; 9-HPT=9 Hole peg test; MSFC=Multiple Sclerosis Functional Composite.
