# Supplementary material for: Tissue factor as a potential coagulative/vascular marker in relapsing-remitting multiple sclerosis
Source: PubMed Central journal article supplement (PMC10424925; doi:10.3389/fimmu.2023.1226616), 2023-07-31
Supplement: Table_1.pdf [file Table_1.pdf]

## STROBE statement: Reporting guidelines checklist for cohort, case-control and cross-sectional studies

| SECTION                   | ITEM NUMBER | CHECKLIST ITEM                                                                                                                                                                                                                                                                                                                                                                                                                             | REPORTED ON PAGE NUMBER:                                           |
|---------------------------|-------------|--------------------------------------------------------------------------------------------------------------------------------------------------------------------------------------------------------------------------------------------------------------------------------------------------------------------------------------------------------------------------------------------------------------------------------------------|--------------------------------------------------------------------|
| <b>TITLE AND ABSTRACT</b> |             |                                                                                                                                                                                                                                                                                                                                                                                                                                            |                                                                    |
|                           | 1a          | Indicate the study's design with a commonly used term in the title or the abstract                                                                                                                                                                                                                                                                                                                                                         | 3                                                                  |
|                           | 1b          | Provide in the abstract an informative and balanced summary of what was done and what was found                                                                                                                                                                                                                                                                                                                                            | 3                                                                  |
| <b>INTRODUCTION</b>       |             |                                                                                                                                                                                                                                                                                                                                                                                                                                            |                                                                    |
| Background and objectives | 2           | Explain the scientific background and rationale for the investigation being reported                                                                                                                                                                                                                                                                                                                                                       | 4                                                                  |
|                           | 3           | State specific objectives, including any pre-specified hypotheses                                                                                                                                                                                                                                                                                                                                                                          | 5                                                                  |
| <b>METHODS</b>            |             |                                                                                                                                                                                                                                                                                                                                                                                                                                            |                                                                    |
| Study design              | 4           | Present key elements of study design early in the paper                                                                                                                                                                                                                                                                                                                                                                                    | 5                                                                  |
| Setting                   | 5           | Describe the setting, locations, and relevant dates, including periods of recruitment, exposure, follow-up, and data collection                                                                                                                                                                                                                                                                                                            | 5                                                                  |
| Participants              | 6a          | Cohort study—Give the eligibility criteria, and the sources and methods of selection of participants. Describe methods of follow-up<br>Case-control study—Give the eligibility criteria, and the sources and methods of case ascertainment and control selection. Give the rationale for the choice of cases and controls<br>Cross-sectional study—Give the eligibility criteria, and the sources and methods of selection of participants | 5                                                                  |
|                           | 6b          | Cohort study—For matched studies, give matching criteria and number of exposed and unexposed<br>Case-control study—For matched studies, give matching criteria and the number of controls per case<br>Variables                                                                                                                                                                                                                            | 5                                                                  |
| Variables                 | 7           | Clearly define all outcomes, exposures, predictors, potential confounders, and effect modifiers. Give diagnostic criteria, if applicable                                                                                                                                                                                                                                                                                                   | 6,21;<br>Supplementary material:<br>supplementary Tables S1 and S2 |

| SECTION                   | ITEM NUMBER | CHECKLIST ITEM                                                                                                                                                                                                                                                                | REPORTED ON PAGE NUMBER:                                       |
|---------------------------|-------------|-------------------------------------------------------------------------------------------------------------------------------------------------------------------------------------------------------------------------------------------------------------------------------|----------------------------------------------------------------|
| Data sources/measurements | 8*          | For each variable of interest, give sources of data and details of methods of assessment (measurement). Describe comparability of assessment methods if there is more than one group.                                                                                         | 6; Supplementary material: Study protocol                      |
| Bias                      | 9           | Describe any efforts to address potential sources of bias.                                                                                                                                                                                                                    | Supplementary material: Study protocol                         |
| Study size                | 10          | Explain how the study size was arrived at                                                                                                                                                                                                                                     | 6                                                              |
| Quantitative variables    | 11          | Explain how quantitative variables were handled in the analyses. If applicable, describe which groupings were chosen and why.                                                                                                                                                 | 6,7; Supplementary material: Supplementary methods (pages 2-6) |
| Statistical methods       | 12a         | Describe all statistical methods, including those used to control for confounding                                                                                                                                                                                             | 6,7                                                            |
|                           | 12b         | Describe any methods used to examine subgroups and interactions                                                                                                                                                                                                               | 6                                                              |
|                           | 12c         | Explain how missing data were addressed                                                                                                                                                                                                                                       | 6,7                                                            |
|                           | 12d         | Cohort study—If applicable, explain how loss to follow-up was addressed<br>Case-control study—If applicable, explain how matching of cases and controls was addressed<br>Cross-sectional study—If applicable, describe analytical methods taking account of sampling strategy | 5                                                              |
|                           | 12e         | Describe any sensitivity analyses                                                                                                                                                                                                                                             | NA                                                             |
| <b>RESULTS</b>            |             |                                                                                                                                                                                                                                                                               |                                                                |
| Participants              | 13a         | Report numbers of individuals at each stage of study—eg numbers potentially eligible, examined for eligibility, confirmed eligible, included in the study, completing follow-up, and analysed                                                                                 | 7                                                              |
|                           | 13b         | Give reasons for non-participation at each stage                                                                                                                                                                                                                              | 7                                                              |
|                           | 13c         | Consider use of a flow diagram                                                                                                                                                                                                                                                | 19,20; Figure 1 as a separate file                             |
| Descriptive Data          | 14a         | Give characteristics of study participants (eg demographic, clinical, social) and information on exposures and potential confounders                                                                                                                                          | 7,8,21                                                         |
|                           | 14b         | Indicate number of participants with missing data for each variable of interest                                                                                                                                                                                               | NA                                                             |

| SECTION           | ITEM NUMBER | CHECKLIST ITEM                                                                                                                                                                                                                                            | REPORTED ON PAGE NUMBER:                                                                |
|-------------------|-------------|-----------------------------------------------------------------------------------------------------------------------------------------------------------------------------------------------------------------------------------------------------------|-----------------------------------------------------------------------------------------|
|                   | 14c         | Cohort study—Summarise follow-up time (eg, average and total amount)                                                                                                                                                                                      | NA                                                                                      |
| Outcome Data      | 15*         | Cohort study—Report numbers of outcome events or summary measures over time<br>Case-control study—Report numbers in each exposure category, or summary measures of exposure<br>Cross-sectional study—Report numbers of outcome events or summary measures | NA<br>7-9, 22-24;<br>Supplementary material:<br>supplementary Tables S3-S6 (pages 6-26) |
| Main Results      | 16a         | Give unadjusted estimates and, if applicable, confounder-adjusted estimates and their precision (e.g. 95% confidence interval). Make clear which confounders were adjusted for and why they were included                                                 | 10,19,20; Figures 2,3 in a separate file                                                |
|                   | 16b         | Report category boundaries when continuous variables were categorized                                                                                                                                                                                     | NA                                                                                      |
|                   | 16c         | If relevant, consider translating estimates of relative risk into absolute risk for a meaningful time period                                                                                                                                              | NA                                                                                      |
|                   | 16d         | Report results of any adjustments for multiple comparisons                                                                                                                                                                                                | NA                                                                                      |
| Other Analyses    | 17a         | Report other analyses done—e.g. analyses of subgroups and interactions, and sensitivity analyses                                                                                                                                                          | Supplementary material:<br>supplementary Table S4 (pages 9,10)                          |
|                   | 17b         | If numerous genetic exposures (genetic variants) were examined, summarize results from all analyses undertaken                                                                                                                                            | NA                                                                                      |
|                   | 17c         | If detailed results are available elsewhere, state how they can be accessed                                                                                                                                                                               | 7<br>(Supplementary material)                                                           |
| <b>DISCUSSION</b> |             |                                                                                                                                                                                                                                                           |                                                                                         |
| Key Results       | 18          | Summarise key results with reference to study objectives                                                                                                                                                                                                  | 10,11                                                                                   |
| Limitations       | 19          | Discuss limitations of the study, taking into account sources of potential bias or imprecision. Discuss both direction and magnitude of any potential bias                                                                                                | 14                                                                                      |
| Interpretation    | 20          | Give a cautious overall interpretation of results considering objectives, limitations, multiplicity of analyses, results from similar studies, and other relevant evidence                                                                                | 10-14                                                                                   |

| <b>SECTION</b>   | <b>ITEM NUMBER</b> | <b>CHECKLIST ITEM</b>                                                                                                                                         | <b>REPORTED ON PAGE NUMBER:</b> |
|------------------|--------------------|---------------------------------------------------------------------------------------------------------------------------------------------------------------|---------------------------------|
| Generalisability | 21                 | Discuss the generalisability (external validity) of the study results<br>Other information                                                                    | 14                              |
| <b>FUNDING</b>   |                    |                                                                                                                                                               |                                 |
|                  | 22                 | Give the source of funding and the role of the funders for the present study and, if applicable, for the original study on which the present article is based | 15                              |
|                  |                    |                                                                                                                                                               |                                 |

\*Give information separately for cases and controls in case-control studies and, if applicable, for exposed and unexposed groups in cohort and cross-sectional studies.
